# Supplementary material
Source: publisher figshare collection journal article supplement (https://acs.figshare.com/ndownloader/files/5112295)

**Sylvaine Cren, Claire Wilson and Neil R. Thomas\***  
*School of Chemistry, Centre for Biomolecular Sciences, University of Nottingham,  
 University Park, Nottingham, UK NG7 2RD. E-mail: neil.thomas@nottingham.ac.uk*

## General information

IR spectra were recorded as solutions using a Perkin-Elmer 1600 series FTIR spectrophotometer.  $^1\text{H}$  and  $^{13}\text{C}$  NMR spectra were recorded using a Bruker AV400 or DRX500 FT spectrometer.  $^1\text{H}$  NMR data are expressed as chemical shift in ppm followed by number of proton(s), multiplicity (s, singlet; d, doublet; t, triplet; q, quartet; m, multiplet) and coupling constant(s)  $J$  (Hz).  $^{13}\text{C}$  NMR chemical shifts are expressed in ppm. Low resolution mass spectra (LRMS) and high resolution mass spectra (HRMS) were obtained using a VG LCT spectrometer using electrospray ionisation (ESI). Microanalysis was performed by the microanalysis section of the School of Chemistry, University of Nottingham, using an Exeter Analytical Inc. CE-440 elemental analyser. Optical rotations were obtained using a Jasco DIP 370 digital polarimeter.  $[\alpha]_{\text{D}}$  Values were measured at the concentration (in g/100 mL) and temperature shown.

CC1(C)OC(=O)C[C@H](O)[C@@H](O)C1

Ethyl-(2*R*)-[(4*S*)-2,2-dimethyl-1,3-dioxolan-4-yl](hydroxy)acetate (1.61 g, 7.89 mmol, 1.0 eq) prepared from L-ascorbic acid<sup>1</sup> was dissolved in anhydrous THF (25 mL). LiAlH<sub>4</sub> (1.0 M in THF, 10.3 mL, 10.3 mmol, 1.3 eq) was added dropwise at 0 °C (ice bath). The resulting

<sup>1</sup> Andre, C.; Bolte, J.; Demuynck, C. *Tetrahedron: Asym.* **1998**, 9, 1359-1367; Abushanab, E.; Vemishetti, P.; Leiby, R.W.; Singh, H.K.; Mikkilineni, A.B.; Wu, D.C.J.; Saibaba, R.; Panzica, R. P. *J. Org. Chem.* **1988**, 53, 2598-602; Abushanab, E.; Bessodes, M.; Antonakis, K. *Tetrahedron Lett.* **1984**, 25, 3841-4.

yellow solution was stirred at 20 °C for 16 h. H<sub>2</sub>O (3 mL) was then carefully added, and the mixture was filtered through a pad of celite and washed with ethyl acetate (50 mL). The filtrate was concentrated *in vacuo* to yield the title compound as a colourless oil (1.28 g, 100%). R<sub>f</sub> 0.30 (ethyl acetate).  $\nu_{\max}$  (CHCl<sub>3</sub>)/cm<sup>-1</sup> 3580, 1374, 1063.  $\delta_{\text{H}}$  (400 MHz, CDCl<sub>3</sub>) 4.16 (1 H, td, *J* 6.6 and 4.6 Hz, 2-CH), 4.04 (1 H, dd, *J* 8.1 and 6.6 Hz, 1-CHH), 3.84 (1 H, dd, *J* 8.2 and 6.7 Hz, 1-CHH), 3.70-3.60 (3 H, m, 4-CH<sub>2</sub>OH, 3-CHOH), 2.88 (1 H, bs, OH), 2.72 (1 H, bs, OH), 1.43 (3 H, s, C(CH<sub>3</sub>)), 1.36 (3 H, s, C(CH<sub>3</sub>)).  $\delta_{\text{C}}$  (100 MHz, CDCl<sub>3</sub>) 109.7 (C(CH<sub>3</sub>)<sub>2</sub>), 76.7 (2-CH), 71.8 (3-CH), 65.9 (1-CH<sub>2</sub>), 64.2 (4-CH<sub>2</sub>), 26.5 (C(CH<sub>3</sub>)<sub>2</sub>), 25.3 (C(CH<sub>3</sub>)<sub>2</sub>). LRMS (ESI) 227 (26%), 185 (100). HRMS (ESI) required for C<sub>7</sub>H<sub>14</sub>NaO<sub>4</sub> 185.0790, found 185.0794.  $[\alpha]_{\text{D}}$  (c 0.62, CHCl<sub>3</sub>) +4.7 at 26 °C (lit.<sup>2</sup>  $[\alpha]_{\text{D}}$  (c 1.8, CH<sub>3</sub>OH) +4.3).

### Alcohol 13

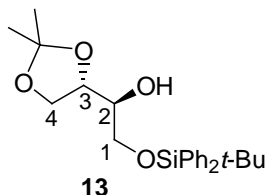

Diol **12** (1.28 g, 7.89 mmol, 1.0 eq) was dissolved in dry DMF (30 mL). Imidazole (1.07 g, 15.78 mmol, 2.0 eq) was added at 20 °C, followed by *tert*-butyldiphenylsilyl chloride (2.05 mL, 7.89 mmol, 1.0 eq). The resulting pale yellow solution was stirred at 20 °C for 16 h. H<sub>2</sub>O (30 mL) and Et<sub>2</sub>O (50 mL) were then added, the layers separated, and the aqueous layer extracted with Et<sub>2</sub>O (3 × 50 mL). The combined organic extracts were dried (MgSO<sub>4</sub>), filtered and concentrated *in vacuo*. The crude oil was purified by column chromatography (petroleum ether (40-60)/diethyl ether, 2:1). The title compound was obtained as a colourless oil (2.31 g, 73%). R<sub>f</sub> 0.25 (petroleum ether (40-60)/diethyl ether, 2:1).  $\nu_{\max}$  (CHCl<sub>3</sub>)/cm<sup>-1</sup> 3568, 2932, 2889, 2859, 1382, 1373, 1112, 1066.  $\delta_{\text{H}}$  (400 MHz, CDCl<sub>3</sub>) 7.35-7.75 (10 H, m, ArH), 4.24 (1 H, ddd, *J* 7.1, 6.5 and 4.3 Hz, 3-CH), 4.02 (1 H, dd, *J* 8.2 and 6.5 Hz, 4-CHH), 3.84 (1 H, dd, *J* 8.2 and 7.1 Hz, 4-CHH), 3.67-3.76 (3 H, m, 1-CH<sub>2</sub>, 2-CHOH), 2.48 (1 H, bs, OH), 1.43 (3 H, s, C(CH<sub>3</sub>)<sub>2</sub>), 1.39 (3 H, s, C(CH<sub>3</sub>)<sub>2</sub>), 1.09 (9 H, s, SiC(CH<sub>3</sub>)<sub>3</sub>).  $\delta_{\text{C}}$  (100 MHz, CDCl<sub>3</sub>) 135.8 (CH Ar), 133.1 (C Ar), 129.9, 127.8 (CH Ar), 109.2 (C(CH<sub>3</sub>)<sub>2</sub>), 76.5 (3-CH), 72.0 (2-CH), 66.1 (4-CH<sub>2</sub>), 65.1 (1-CH<sub>2</sub>), 26.9 (C(CH<sub>3</sub>)<sub>3</sub>), 26.6 (C(CH<sub>3</sub>)<sub>2</sub>), 25.4 (C(CH<sub>3</sub>)<sub>2</sub>), 19.3

<sup>2</sup> Neuß, O.; Furman, B.; Kaluza, Z.; Chmielewski, M. *Heterocycles* **1997**, 45, 265-270.

(SiC(CH<sub>3</sub>)<sub>3</sub>). LRMS (ESI) 423 (100%), 343 (9), 187 (8). HRMS (ESI) required for C<sub>23</sub>H<sub>32</sub>NaO<sub>4</sub>Si 423.1968, found 423.1952. [ $\alpha$ ]<sub>D</sub> (c 1.11, CHCl<sub>3</sub>) +4.3 at 24 °C (lit.<sup>3</sup> [ $\alpha$ ]<sub>D</sub> (c 2.1, CHCl<sub>3</sub>) +4.4 at 22 °C).

## Ketone 14

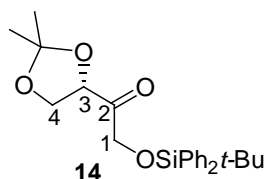

Oxalyl chloride (1.01 mL, 11.56 mmol, 2.0 eq) was dissolved in CH<sub>2</sub>Cl<sub>2</sub> (pre-dried on 3 Å MS, 25 mL). DMSO (pre-dried on 3 Å MS, 1.64 mL, 23.12 mmol, 4.0 eq) was added at -60 °C. The resulting colourless solution was stirred at -60 °C for 5 min. Alcohol **5** (2.31 g, 5.78 mmol, 1.0 eq) in CH<sub>2</sub>Cl<sub>2</sub> (pre-dried on 3 Å MS, 50 mL) was added at -60 °C. The resulting white suspension was stirred at -60 °C for 15 min. Et<sub>3</sub>N (3.22 mL, 23.12 mmol, 4.0 eq) was then added, and the pale yellow suspension was allowed to warm to 0 °C over 1.5 h. The reaction mixture was concentrated *in vacuo* and the residue was purified by column chromatography (petroleum ether (40-60)/diethyl ether, 2:1). The title compound was obtained as a colourless oil (2.06 g, 90%). R<sub>f</sub> 0.45 (petroleum ether (40-60)/diethyl ether, 2:1).  $\nu_{\text{max}}$  (CHCl<sub>3</sub>)/cm<sup>-1</sup> 2932, 2893, 2859, 1736, 1384, 1375, 1113, 1082.  $\delta_{\text{H}}$  (400 MHz, CDCl<sub>3</sub>) 7.30-7.75 (10 H, m, ArH), 4.61 (1 H, dd, *J* 7.9 and 5.6 Hz, 3-CH), 4.53 (2 H, s, 1-CH<sub>2</sub>), 4.21 (1 H, dd, *J* 8.8 and 7.9 Hz, 4-CHH), 3.87 (1 H, dd, *J* 8.8 and 5.6 Hz, 4-CHH), 1.34 (3 H, s, C(CH<sub>3</sub>)<sub>2</sub>), 1.31 (3 H, s, C(CH<sub>3</sub>)<sub>2</sub>), 1.12 (9 H, s, SiC(CH<sub>3</sub>)<sub>3</sub>).  $\delta_{\text{C}}$  (100 MHz, CDCl<sub>3</sub>) 207.2 (2-CO), 135.6 (CH Ar), 132.7 (C Ar), 130.1, 127.9 (CH Ar), 111.0 (C(CH<sub>3</sub>)<sub>2</sub>), 79.0 (3-CHOC(CH<sub>3</sub>)<sub>2</sub>), 68.0 (1-CH<sub>2</sub>), 66.4 (4-CH<sub>2</sub>), 26.8 (SiC(CH<sub>3</sub>)<sub>3</sub>), 25.8 (C(CH<sub>3</sub>)<sub>2</sub>), 25.1 (C(CH<sub>3</sub>)<sub>2</sub>), 19.3 (C(CH<sub>3</sub>)<sub>3</sub>). LRMS (ESI) 453 (69%), 421 (100), 321 (43), 263 (29). HRMS (ESI) required for C<sub>23</sub>H<sub>30</sub>NaO<sub>4</sub>Si 421.1811, found 421.1802. [ $\alpha$ ]<sub>D</sub> (c 4.96, CHCl<sub>3</sub>) -21.0 at 28 °C (lit.<sup>3</sup> [ $\alpha$ ]<sub>D</sub> (c 2.5, CHCl<sub>3</sub>) -19.5 at 22 °C).

<sup>3</sup> Marco, J. A.; Carda, M.; Gonzalez, F.; Rodriguez, S.; Murga, J. *Liebigs Ann.* **1996**, 1801-1810.

## Alkene 15

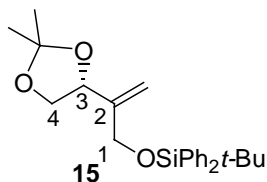

Ph<sub>3</sub>PCH<sub>3</sub>Br (2.59 g, 7.25 mmol, 1.4 eq) was suspended in anhydrous THF (50 mL). *n*-BuLi (3.56 mL, 1.6 M in THF, 5.69 mmol, 1.1 eq) was added dropwise at 0 °C. The resulting bright yellow suspension was stirred at 20 °C for 3 h. Ketone **14** (2.06 g, 5.18 mmol, 1.0 eq) in anhydrous THF (20 mL) was then added at -78 °C. The resulting orange suspension was stirred at -78 °C for 45 min, then at 20 °C for 2 h. The reaction was quenched by careful addition of MeOH (10 mL) at 0 °C. Et<sub>2</sub>O (100 mL) was added and the organic phase was successively washed with saturated aqueous NH<sub>4</sub>Cl (3 × 100 mL) and saturated aqueous NaCl (3 × 100 mL). The combined aqueous layers were back-extracted with diethyl ether (3 × 200 mL). The combined organic extracts were dried (Mg SO<sub>4</sub>), filtered and concentrated *in vacuo*. The crude residue was purified by column chromatography (*n*-hexane/diethyl ether, 10:1). The title compound was obtained as a colourless oil (1.70 g, 83%). R<sub>f</sub> 0.30 (*n*-hexane/diethyl ether, 10:1).  $\nu_{\max}$  (CHCl<sub>3</sub>)/cm<sup>-1</sup> 2932, 2859, 1382, 1372, 1112, 1062.  $\delta_{\text{H}}$  (400 MHz, CDCl<sub>3</sub>) 7.35-7.75 (10 H, m, ArH), 5.28 (2 H, m, 2-C=CH<sub>2</sub>), 4.61 (1 H, m, 3-CH), 4.21 (2 H, d, *J* 0.8 Hz, 1-CH<sub>2</sub>), 4.14 (1 H, dd, *J* 8.2 and 6.5 Hz, 4-CHH), 3.65 (1 H, app. t, *J* 8.0 Hz, 4-CHH), 1.40 (6 H, s, C(CH<sub>3</sub>)<sub>2</sub>), 1.08 (9 H, s, SiC(CH<sub>3</sub>)<sub>3</sub>).  $\delta_{\text{C}}$  (100 MHz, CDCl<sub>3</sub>) 145.8 (2-C=CH<sub>2</sub>), 135.6 (CH Ar meta), 133.4 (C Ar), 129.8 (CH Ar para), 127.8 (CH Ar ortho), 111.0 (2-C=CH<sub>2</sub>), 109.1 (C(CH<sub>3</sub>)<sub>2</sub>), 76.9 (3-CH), 69.6 (4-CH<sub>2</sub>), 64.4 (1-CH<sub>2</sub>), 26.9 (C(CH<sub>3</sub>)<sub>3</sub>), 26.3 (SiC(CH<sub>3</sub>)<sub>2</sub>), 25.8 (C(CH<sub>3</sub>)<sub>2</sub>), 19.3 (SiC(CH<sub>3</sub>)<sub>3</sub>). LRMS (ESI) 419 (100%), 279 (41). HRMS (ESI) required for C<sub>24</sub>H<sub>32</sub>NaO<sub>3</sub>Si 419.2018, found 419.1991. [ $\alpha$ ]<sub>D</sub> (c 1.29, CHCl<sub>3</sub>) -21.8 at 29 °C.

## Alcohol 16

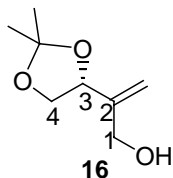

Alkene **15** (396 mg, 1.0 mmol, 1.0 eq) was dissolved in anhydrous THF (8 mL). TBAF (2 mL, 1.0 M in THF, 2.0 mmol, 2.0 eq) was added dropwise and the resulting yellow solution was stirred at 20 °C for 24 h. Saturated aqueous NH<sub>4</sub>Cl (12 mL) was added, the layers were

separated and the aqueous layer extracted with diethyl ether ( $3 \times 20$  mL). The combined organic extracts were dried ( $\text{MgSO}_4$ ), filtered and concentrated *in vacuo*. The crude oil was purified by column chromatography (diethyl ether) and the title compound obtained as a colourless oil (155 mg, 98%).  $R_f$  0.67 (diethyl ether).  $\nu_{\text{max}}$  ( $\text{CHCl}_3$ )/ $\text{cm}^{-1}$  3611, 3541, 2987, 2935, 2879, 1382, 1373, 1063.  $\delta_{\text{H}}$  (400 MHz,  $\text{CDCl}_3$ ) 5.17-5.19 (2 H, m, 2-C=CH<sub>2</sub>), 4.64 (1 H, dd,  $J$  7.2 and 7.0 Hz, 3-CH), 4.18 (1 H, d,  $J$  13.4 Hz, 1-CHH), 4.13 (1 H, dd,  $J$  8.2 and 6.5 Hz, 4-CHH), 4.09 (1 H, d,  $J$  13.4 Hz, 1-CHH), 3.69 (1 H, dd,  $J$  8.2 and 7.7 Hz, 4-CHH), 2.50 (1 H, bs, 1-OH), 1.43 (3 H, s,  $\text{CH}_3$ ), 1.37 (3 H, s,  $\text{CH}_3$ ).  $\delta_{\text{C}}$  (100 MHz,  $\text{CDCl}_3$ ) 145.8 (2-C=CH<sub>2</sub>), 113.1 (2-C=CH<sub>2</sub>), 109.4 ( $\text{C}(\text{CH}_3)_2$ ), 77.6 (3-CH), 69.0 (4-CH<sub>2</sub>), 63.2 (1-CH<sub>2</sub>OH), 26.3 ( $\text{C}(\text{CH}_3)_2$ ), 25.5 ( $\text{C}(\text{CH}_3)_2$ ). LRMS (ESI) 222 (62%), 181 (100). HRMS (ESI) required for  $\text{C}_8\text{H}_{14}\text{NaO}_3$  181.0841, found 181.0855.  $[\alpha]_{\text{D}}$  (c 1.20,  $\text{CHCl}_3$ ) -51.4 at 29 °C (lit.<sup>4</sup>  $[\alpha]_{\text{D}}$  (c 20,  $\text{CHCl}_3$ ) -45.5 at 20 °C).

### Mesylate **17**

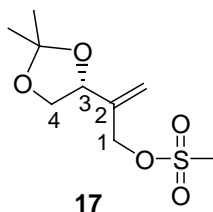

Alcohol **16** (131 mg, 0.83 mmol, 1.0 eq) was dissolved in  $\text{CH}_2\text{Cl}_2$  (10 mL).  $\text{Et}_3\text{N}$  (0.17 mL, 1.24 mmol, 1.5 eq) was added at 0 °C, followed by methanesulfonyl chloride (0.10 mL, 1.24 mmol, 1.5 eq). The resulting colourless solution was stirred at 0 °C for 1 h.  $\text{H}_2\text{O}$  (10 mL) was added, the layers separated and the organic layer successively washed with 1M  $\text{HCl}$  (10 mL), saturated aqueous  $\text{NaHCO}_3$  (10 mL) and  $\text{H}_2\text{O}$  (10 mL). The organic layer was then dried ( $\text{MgSO}_4$ ), filtered and concentrated *in vacuo* to yield a colourless oil which was used without any purification. A sample was further purified by column chromatography (*n*-hexane/diethyl ether, 1:1).  $R_f$  0.13 (*n*-hexane/diethyl ether, 1:1).  $\nu_{\text{max}}$  ( $\text{CHCl}_3$ )/ $\text{cm}^{-1}$  2986, 2938, 2887, 1456, 1360, 1153, 1066, 993, 971, 912, 864.  $\delta_{\text{H}}$  (400 MHz,  $\text{CDCl}_3$ ) 5.46 (1 H, bs, 2-C=CHH), 5.39 (1 H, bs, 2-C=CHH), 4.72-4.79 (2 H, m, 1-CH<sub>2</sub>OMs), 4.65 (1 H, dd,  $J$  7.0 and 6.9 Hz, 3-CH), 4.18 (1 H, dd,  $J$  8.4 and 6.5 Hz, 4-CHH), 3.73 (1 H, dd,  $J$  8.4 and 7.4 Hz, 4-CHH), 3.04 (3 H, s,  $\text{SO}_2\text{CH}_3$ ), 1.46 (3 H, s,  $\text{C}(\text{CH}_3)_2$ ), 1.40 (3 H, s,  $\text{C}(\text{CH}_3)_2$ ).  $\delta_{\text{C}}$  (100 MHz,  $\text{CDCl}_3$ ) 140.0 (2-C=CH<sub>2</sub>), 117.7 (2-C=CH<sub>2</sub>), 109.7 (3-C( $\text{CH}_3$ )<sub>2</sub>), 76.5 ( $\text{CHOC}(\text{CH}_3)_2$ ), 69.1 (1-CH<sub>2</sub>OMs), 68.9

<sup>4</sup> Van der Eycken, E.; De Wilde, H.; Deprez, L.; Vandewalle, M. *Tetrahedron Lett.* **1987**, 28, 4759-60.

(4-CH<sub>2</sub>OC(CH<sub>3</sub>)<sub>2</sub>), 38.0 (SO<sub>2</sub>CH<sub>3</sub>), 26.3 (C(CH<sub>3</sub>)<sub>2</sub>), 25.5 (C(CH<sub>3</sub>)<sub>2</sub>). LRMS (ESI) 300 (57%), 259 (100), 237 (5). HRMS (ESI) required for C<sub>9</sub>H<sub>16</sub>NaO<sub>5</sub>S 259.0616, found 259.0615. [ $\alpha$ ]<sub>D</sub> (c 2.34, CHCl<sub>3</sub>) -36.0 at 27 °C.

### Diene 18

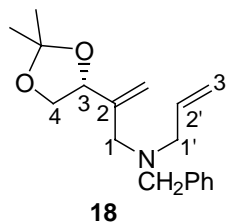

NaH (24 mg, 60% dispersion in oil, 0.59 mmol, 1.5 eq) was suspended in dry THF (4 mL). *N*-Benzylallylamine (57 mg, 0.39 mmol, 1.0 eq) in dry THF (1 mL) was added dropwise at 0 °C, and the resulting orange suspension was stirred at 20 °C for 2 h. The mixture was then cooled to 0 °C, and a solution of mesylate **17** (92 mg, 0.39 mmol, 1.0 eq) in dry THF (4 mL) was added dropwise. The orange suspension was stirred at 20 °C for 1 d, then under reflux for 5 d. The reaction was quenched by the addition of H<sub>2</sub>O (8 mL). The layers were separated, and the aqueous layer extracted with Et<sub>2</sub>O (3 × 10 mL). The combined organic extracts were dried (MgSO<sub>4</sub>), filtered and concentrated *in vacuo* to give a crude oil which was purified by column chromatography (petroleum ether (40-60)/diethyl ether, 4:1). The title compound was obtained as a yellow oil (62 mg, 55%). R<sub>f</sub> 0.55 (petroleum ether (40-60)/diethyl ether, 4:1).  $\nu_{\max}$  (CHCl<sub>3</sub>)/cm<sup>-1</sup> 2929, 2881, 2804, 1454, 1382, 1372, 1120, 1065, 994.  $\delta_{\text{H}}$  (400 MHz, CDCl<sub>3</sub>) 7.20-7.40 (5 H, m, ArH), 5.87 (1 H, ddt, *J* 16.6, 10.2 and 6.3 Hz, 2'-CH=CH<sub>2</sub>), 5.36 (1 H, bs, 2-C=CHH), 5.15-5.24 (3 H, m, 2'-CH=CH<sub>2</sub> and 2-C=CHH), 4.58 (1 H, dd, *J* 7.3 and 7.0 Hz, 3-CH), 4.13 (1 H, dd, *J* 8.0 and 6.4 Hz, 4-CHH), 3.58 (1 H, d, *J* 13.6 Hz, NCHHPh), 3.56 (1 H, t, *J* 8.0 Hz, 4-CHH), 3.49 (1 H, d, *J* 13.6 Hz, NCHHPh), 2.96-3.08 (4 H, m, 1- and 1'-NCH<sub>2</sub>), 1.43 (3 H, s, CH<sub>3</sub>), 1.42 (3 H, s, CH<sub>3</sub>).  $\delta_{\text{C}}$  (100 MHz, CDCl<sub>3</sub>) 144.7 (2-C=CH<sub>2</sub>), 139.4 (C Ar), 135.6 (2'-CH=CH<sub>2</sub>), 128.9, 128.3, 127.0 (CH Ar), 117.7 (2'-CH=CH<sub>2</sub>), 113.2 (2-C=CH<sub>2</sub>), 108.9 (C(CH<sub>3</sub>)<sub>2</sub>), 77.3 (3-CH), 69.6 (4-CH<sub>2</sub>), 58.1 (NCH<sub>2</sub>Ph), 56.9, 56.4 (1- and 1'-CH<sub>2</sub>N), 26.4 (C(CH<sub>3</sub>)<sub>2</sub>), 26.0 (C(CH<sub>3</sub>)<sub>2</sub>). LRMS (ESI) 288 (100%), 230 (23). HRMS (ESI) required for C<sub>18</sub>H<sub>26</sub>NO<sub>2</sub> 288.1964 found 288.1955. [ $\alpha$ ]<sub>D</sub> (c 2.14, CHCl<sub>3</sub>) +46.8 at 26 °C.

## Pyrrole 19

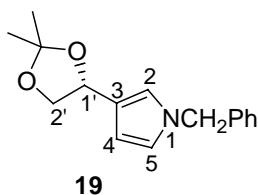

Diene **18** (18 mg, 0.06 mmol, 1.0 eq) was dissolved in dry toluene (2 mL). Ruthenium complex **2** (<10 mg, cat.) was added in 2 portions at 20 °C. The resulting purple solution turned brown after 10 min. The reaction mixture was stirred under reflux for 2 h, and then concentrated *in vacuo* and the residue purified by column chromatography (silica, petroleum ether (40-60)/diethyl ether, 6:1). The title compound was obtained as a yellow liquid (16 mg, 99%).  $R_f$  0.23 (petroleum ether (40-60)/diethyl ether, 6:1).  $\nu_{\max}$  (CHCl<sub>3</sub>)/cm<sup>-1</sup> 2927, 2855, 2360, 1710, 1455, 1372, 1157, 1057, 866.  $\delta_H$  (400 MHz, CDCl<sub>3</sub>) 7.28-7.35 (3 H, m, ArH), 7.13-7.15 (2 H, m, ArH), 6.73, 6.66 (1 H, t,  $J$  2.0 Hz, 2-CH and 5-CH), 6.22 (1 H, dd,  $J$  2.7 and 1.8 Hz, 4-CH), 5.04 (1 H, dd,  $J$  8.6 and 5.9 Hz, 1'-CH), 5.02 (2 H, s, CH<sub>2</sub>Ph), 4.19 (1 H, dd,  $J$  8.0 and 5.9 Hz, 2'-CHH), 3.81 (1 H, dd,  $J$  8.6 and 8.0 Hz, 2'-CHH), 1.50 and 1.45 (3 H, s, CH<sub>3</sub>).  $\delta_C$  (100 MHz, CDCl<sub>3</sub>) 137.8 (C, Ar), 128.8, 127.8, 127.3 (CH, Ar), 122.0 (2-CH or 5-CH), 121.4 (3-C), 120.0 (2-CH or 5-CH), 108.9 (C(CH<sub>3</sub>)<sub>2</sub>), 107.2 (4-CH), 72.9 (1'-CH), 70.8 (2-CH<sub>2</sub>), 53.6 (CH<sub>2</sub>Ph), 27.0 (C(CH<sub>3</sub>)<sub>2</sub>), 26.3 (C(CH<sub>3</sub>)<sub>2</sub>). LRMS (ESI) 280 (62%), 200 (100). HRMS (ESI) required for C<sub>16</sub>H<sub>19</sub>NNaO<sub>2</sub> 280.1320 found 280.1313.  $[\alpha]_D$  (c 0.92, CHCl<sub>3</sub>) -17.0 at 30 °C.

## Amine 20

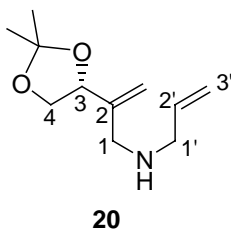

Mesylate **17** (791 mg, 3.35 mmol, 1.0 eq) in CH<sub>2</sub>Cl<sub>2</sub> (10 mL) was slowly added to a stirred solution of allylamine (1.25 mL, 16.8 mmol, 5.0 eq) in CH<sub>2</sub>Cl<sub>2</sub> (20 mL). The resulting colourless solution was stirred at 20 °C for 24 h. The mixture was then concentrated *in vacuo*

and the residue purified by column chromatography (petroleum ether (40-60)/diethyl ether, 1:2, 0.5% NH<sub>3</sub>). The title compound was obtained as a yellow liquid (607 mg, 92%). *R*<sub>f</sub> 0.41 (petroleum ether (40-60)/diethyl ether, 1:2, 0.5% NH<sub>3</sub>). *v*<sub>max</sub> (CHCl<sub>3</sub>)/cm<sup>-1</sup> 2985, 2934, 2884, 1455, 1382, 1372, 1154, 1063, 994, 863.  $\delta_{\text{H}}$  (400 MHz, CDCl<sub>3</sub>) 5.89 (1 H, ddt, *J* 17.2, 10.2 and 6.0 Hz, 2'-CH=CH<sub>2</sub>), 5.23 (1 H, bs, 2-C=CHH), 5.17 (1 H, dq, *J* 17.2 and 1.7 Hz, 2'-CH=CH<sub>2</sub> *trans*), 5.07-5.11 (2 H, m, 2'-CH=CH<sub>2</sub> *cis* and 2-C=CHH), 4.61 (1 H, dd, *J* 7.1 Hz, 1-CH), 4.15 (1 H, dd, *J* 8.1 and 6.6 Hz, 4-CHH), 3.66 (1 H, dd, *J* 8.0 Hz, 4-CHH), 3.19-3.30 (4 H, m, 1- and 1'-CH<sub>2</sub>NH), 1.44 (3 H, 2 × s, CH<sub>3</sub>), 1.39 (3 H, 2 × s, CH<sub>3</sub>).  $\delta_{\text{C}}$  (100 MHz, CDCl<sub>3</sub>) 145.0 (2-C=CH<sub>2</sub>), 136.8 (2'-CH=CH<sub>2</sub>), 116.0 (2'-CH=CH<sub>2</sub>), 112.5 (2-C=CH<sub>2</sub>), 109.2 (C(CH<sub>3</sub>)<sub>2</sub>), 78.0 (3-CH), 69.3 (4-CH<sub>2</sub>), 51.8, 50.6 (1- and 1'-CH<sub>2</sub>), 26.4 (C(CH<sub>3</sub>)<sub>2</sub>), 26.0 (C(CH<sub>3</sub>)<sub>2</sub>). LRMS 198 (67%), 140 (100). HRMS (ESI) required for C<sub>11</sub>H<sub>20</sub>NO<sub>2</sub> 198.1494 found 198.1497.  $[\alpha]_{\text{D}}$  (c 1.19, CHCl<sub>3</sub>) -47.8 at 30 °C.

## Diene 21

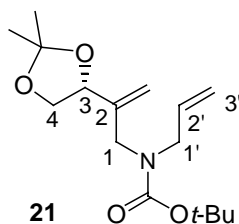

Amine **20** (214 mg, 1.09 mmol, 1.0 eq) was dissolved in *n*-hexane (10 mL). A solution of Boc<sub>2</sub>O (237 mg, 1.09 mmol, 1.0 eq) in *n*-hexane (5 mL) was then added dropwise at 0 °C, and the resulting colourless solution was stirred at 20 °C for 1 h. A solution of 0.01 N HCl (20 mL) was then added, the layers separated and the organic layer washed with saturated aqueous NaHCO<sub>3</sub> (20 mL), dried (Na<sub>2</sub>SO<sub>4</sub>), filtered and concentrated *in vacuo* to give a crude oil. The residue was purified by column chromatography (*n*-hexane/diethyl ether, 3:1) and the title compound was obtained as a yellow oil (319 mg, 98%). *R*<sub>f</sub> 0.38 (*n*-hexane/diethyl ether, 3:1). *v*<sub>max</sub> (CHCl<sub>3</sub>)/cm<sup>-1</sup> 2982, 2933, 1683, 1456, 1368, 1065.  $\delta_{\text{H}}$  (400 MHz, CDCl<sub>3</sub>) 5.72 (1 H, m, 2'-CH=CH<sub>2</sub>), 5.06-5.27 (3 H, m, 2-C=CHH and 2'-CH<sub>2</sub>=CH), 4.92 (1 H, bs, 2-C=CHH), 4.52 (1 H, app. t, *J* 7.0 Hz, 3-CH), 4.11 (1 H, m, C4-CHH), 3.69-3.89 (4 H, m, 1- and 1'-CH<sub>2</sub>), 3.61 (1 H, app. t, *J* 7.8 Hz, 4-CHH), 1.42 (9 H, s, NO<sub>2</sub>C(CH<sub>3</sub>)<sub>3</sub>), 1.41 (3 H, s, C(CH<sub>3</sub>)<sub>2</sub>), 1.36 (3 H, s, C(CH<sub>3</sub>)<sub>2</sub>).  $\delta_{\text{C}}$  (100 MHz, CDCl<sub>3</sub>) 155.5 (NCO), 142.7 (2-C=CH<sub>2</sub>), 133.5 (2'-CH=CH<sub>2</sub>), 116.9 and 116.5 (2'-CH=CH<sub>2</sub>), 112.3 and 111.2 (2-C=CH<sub>2</sub>), 109.2



(NO<sub>2</sub>C(CH<sub>3</sub>)<sub>2</sub>), 79.8 (C(CH<sub>3</sub>)<sub>3</sub>), 76.9 (3-CHCH<sub>2</sub>), 69.0 (4-CH<sub>2</sub>), 48.7, 47.3 (1- and 1'-CH<sub>2</sub>NH and NHCH<sub>2</sub>), 28.3 (NO<sub>2</sub>C(CH<sub>3</sub>)<sub>3</sub>), 26.3 (C(CH<sub>3</sub>)<sub>2</sub>), 25.5 (C(CH<sub>3</sub>)<sub>2</sub>). LRMS (ESI) 320 (100%), 264 (16), 184 (21). HRMS (ESI) required for C<sub>16</sub>H<sub>27</sub>NNaO<sub>4</sub> 320.1838 found 320.1851. [α]<sub>D</sub> (c 1.04, CHCl<sub>3</sub>) -11.6 at 29 °C. Anal. calc. for C<sub>16</sub>H<sub>27</sub>NO<sub>4</sub> C, 64.62%; H, 9.15%; N, 4.71%; found C, 64.49%; H, 9.13%; N, 4.99%.

## Pyrroline 22

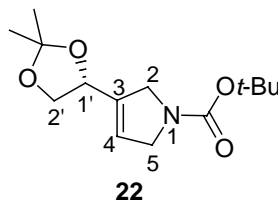

Diene **21** (319 mg, 1.07 mmol, 1.0 eq) was dissolved in dry CH<sub>2</sub>Cl<sub>2</sub> (40 mL). Ruthenium complex **2** (10 mg, 1 mol%) was added in 3 portions at 20 °C. The resulting purple solution turned brown after 10 min. The reaction mixture was stirred at 20 °C for 36 h, and then concentrated *in vacuo*. The residue was purified by column chromatography (Florisil, *n*-hexane/diethyl ether, 2:1). The title compound was obtained as a yellow oil (271 mg, 94%). R<sub>f</sub> 0.22 (*n*-hexane/diethyl ether, 2:1). ν<sub>max</sub> (CHCl<sub>3</sub>)/cm<sup>-1</sup> 2980, 2866, 1693, 1660, 1392, 1368, 1123, 1062, 874. δ<sub>H</sub> (400 MHz, CDCl<sub>3</sub>) 5.71 (1 H, bd, *J* 11.8 Hz, 4-CH), 4.68 (1 H, t, *J* 6.8 Hz, 1'-CH), 4.09-4.19 (5 H, m, 2-,5-CH<sub>2</sub> and 2'-CHH), 3.71 (1 H, m, 2'-CHH), 1.45 (9 H, s, NO<sub>2</sub>C(CH<sub>3</sub>)<sub>3</sub>), 1.40 (3 H, s, C(CH<sub>3</sub>)<sub>2</sub>), 1.36 (3 H, s, C(CH<sub>3</sub>)<sub>2</sub>). δ<sub>C</sub> (100 MHz, CDCl<sub>3</sub>) 154.3 (NCO), 137.7 (3-C), 122.2 (4-CH), 109.6 (C(CH<sub>3</sub>)<sub>2</sub>), 79.5 (C(CH<sub>3</sub>)<sub>3</sub>), 73.2 (1'-CH), 67.9 (2'-CH<sub>2</sub>), 53.3 and 53.0 (2- and 5- CH<sub>2</sub>), 52.0 and 51.7 (2- and 5- CH<sub>2</sub>),\* 28.5 (C(CH<sub>3</sub>)<sub>3</sub>), 26.3 (C(CH<sub>3</sub>)<sub>2</sub>), 25.6 and 25.5 (C(CH<sub>3</sub>)<sub>2</sub>). LRMS (ESI) *m/z* 561 (74%), 333 (85), 324 (92), 292 (100), 170 (98). HRMS (ESI) required for C<sub>14</sub>H<sub>23</sub>NNaO<sub>4</sub> 292.1525 found 292.1510. [α]<sub>D</sub> (c 1.09, CHCl<sub>3</sub>) -24.8 at 27 °C. Anal. calc. for C<sub>14</sub>H<sub>23</sub>NO<sub>4</sub> C, 62.43%; H, 8.61%; N, 5.20%; found C, 62.79%; H, 8.64%; N, 4.89%.

\* rotamers

## Alcohols 23 and 24

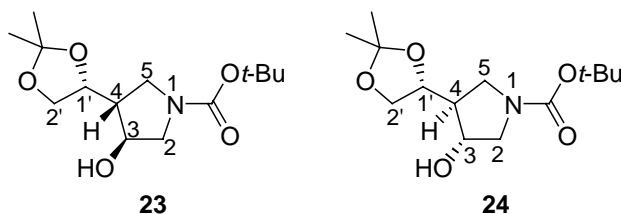

Pyrroline **22** (269 mg, 1.0 mmol, 1.0 eq) was dissolved in anhydrous THF (10 mL).  $\text{BH}_3 \cdot \text{THF}$  (1.1 mL, ~1.0 M in THF, 1.1 mmol, 1.1 eq) was added dropwise at 20 °C. The resulting colourless solution was stirred at 20 °C for 2 h. The reaction mixture was then added to a solution of  $\text{H}_2\text{O}_2$  (10 mL, ~30%) and aqueous NaOH (2 M, 10 mL). The suspension was stirred at 20 °C for 16 h and extracted with diethyl ether ( $4 \times 40$  mL). The combined organic extracts were dried ( $\text{MgSO}_4$ ), filtered and concentrated *in vacuo*. The crude oil was purified by column chromatography (silica, petroleum ether 40-60/ethyl acetate, 1:1).

**23**: colourless oil that crystallised on standing, 113 mg, 40%.  $R_f$  0.48 (ethyl acetate).  $\nu_{\text{max}}$  ( $\text{CHCl}_3$ )/ $\text{cm}^{-1}$  3561, 2980, 2935, 2882, 1682, 1455, 1368, 1143, 1095, 1061, 880.  $\delta_{\text{H}}$  (400 MHz,  $\text{CDCl}_3$ ) 4.34 (1 H, q,  $J$  6.6 Hz, 1'-CH), 4.07 (1 H, dd,  $J$  7.9 and 6.2 Hz, 2-CHH), 4.00 (1 H, m, 3-CHOH), 3.73 (1 H, m, 2'-CHH), 3.65 (1 H, m, 2-CHH), 3.53 (1 H, m, 5-CHH), 3.21 (1 H, m, 2'-CHH), 2.98 (1 H, app. dt,  $J$  10.8 and 8.0 Hz, 5-CHH), 2.77 (1 H, bs, OH), 2.19 (1 H, m, 4-CH), 1.45 (9 H, s,  $\text{NO}_2\text{C}(\text{CH}_3)_3$ ), 1.44 ( $\text{C}(\text{CH}_3)_2$ ), 1.36 ( $\text{C}(\text{CH}_3)_2$ ).  $\delta_{\text{C}}$  (100 MHz,  $\text{CDCl}_3$ ) 154.6 and 154.3 (NCO), 109.7 ( $\text{C}(\text{CH}_3)_2$ ), 79.7 ( $\text{C}(\text{CH}_3)_3$ ), 77.7 and 77.3 (3-CHOH), 73.8 and 72.9 (1'-CH), 68.5 and 68.4 (2-CH<sub>2</sub>),\* 52.1 and 51.8 (2'-CH<sub>2</sub>),\* 49.5 and 48.9 (4-CH), 46.3 and 45.8 (5-CH<sub>2</sub>),\* 28.5 ( $\text{NO}_2\text{C}(\text{CH}_3)_3$ ), 26.8 ( $\text{C}(\text{CH}_3)_2$ ), 25.5 ( $\text{C}(\text{CH}_3)_2$ ). LRMS (ESI)  $m/z$  597 (5%), 351 (21), 310 (100), 188 (24), 130 (11). HRMS (ESI) required for  $\text{C}_{14}\text{H}_{25}\text{NNaO}_5$  310.1630 found 310.1653.  $[\alpha]_{\text{D}}$  (c 1.63,  $\text{CHCl}_3$ ) -29.3 at 27 °C.

**24**: colourless oil, 67 mg, 24%.  $R_f$  0.34 (ethyl acetate).  $\nu_{\text{max}}$  ( $\text{CHCl}_3$ )/ $\text{cm}^{-1}$  3614, 2981, 2932, 2885, 1682, 1455, 1368, 1132, 1058, 881.  $\delta_{\text{H}}$  (400 MHz,  $\text{CDCl}_3$ ) 4.25-4.00 (3 H, m, 3-CHOH, 1'-CH, 2'-CHH or 2-CH), 3.72 (2 H, m, 2-CHH and 2'-CHH), 3.63 (1 H, dd,  $J$  10.2 and 8.8 Hz, 5-CHH), 3.29 (1 H, dd,  $J$  10.2 and 8.0 Hz, 5-CHH), 3.21 (1 H, m, 2'-CHH or 2-CHH), 2.80 and 2.69 (1 H, bs, OH), 2.26 (1 H, m, 4-CH), 1.46 (9 H, s,  $\text{NO}_2\text{C}(\text{CH}_3)_3$ ), 1.41 ( $\text{C}(\text{CH}_3)_2$ ), 1.36 (3- $\text{C}(\text{CH}_3)_2$ ).  $\delta_{\text{C}}$  (100 MHz,  $\text{CDCl}_3$ ) 154.6 (NCO), 109.1 ( $\text{C}(\text{CH}_3)_2$ ), 79.7 ( $\text{C}(\text{CH}_3)_3$ ), 76.1 and 75.3 (3-CHOH or 1'-CH), 72.3 and 71.7 (1'-CH or 3-CHOH), 67.9 and 67.6 (2-CH<sub>2</sub> or 2'-CH<sub>2</sub>), 53.1 and 52.8 (2'-CH<sub>2</sub> or 2-CH<sub>2</sub>), 49.2 and 48.0 (4-CH),\* 46.5 and

45.5 (5-CH<sub>2</sub>),\* 28.6 (NO<sub>2</sub>C(CH<sub>3</sub>)<sub>3</sub>), 26.6 (C(CH<sub>3</sub>)<sub>2</sub>), 25.5 (C(CH<sub>3</sub>)<sub>2</sub>). LRMS (ESI) *m/z* 597 (40%), 351 (24), 310 (100), 188 (36), 130 (5). HRMS (ESI) required for C<sub>14</sub>H<sub>25</sub>NNaO<sub>5</sub> 310.1630 found 310.1636. [α]<sub>D</sub> (c 1.63, CHCl<sub>3</sub>) +25.5 at 22 °C.

\* rotamers

### Iminosugar **25**

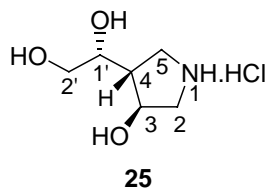

Alcohol **23** (31 mg, 0.11 mmol, 1.0 eq) was stirred in 1 M HCl (2 mL) at 20 °C for 16 h. The resulting pale yellow solution was then concentrated *in vacuo* and the residue purified by reverse-phase column chromatography (20% MeOH in water). The title compound was obtained as a colourless oil (20 mg, 100%). δ<sub>H</sub> (400 MHz, D<sub>2</sub>O) 4.55 (1 H, app. dt, *J* 5.8 and 3.1 Hz, 3-CHOH), 3.88 (1 H, dd, *J* 6.5 and 3.8 Hz, 1'-CH), 3.61 (1 H, m, 2'-CHHOH), 3.59 (1 H, dd, *J* 12.3 and 8.3 Hz, 5-CHH), 3.53 (1 H, dd, *J* 11.6 and 6.6 Hz, 2'-CHHOH), 3.39 (1 H, dd, *J* 12.6 and 5.4 Hz, 2-CHH), 3.23 (1 H, dd, *J* 12.6 and 2.8 Hz, 2-CHH), 3.13 (1 H, dd, *J* 12.3 and 6.9 Hz, 5-CHH), 2.37 (1 H, m, 4-CH). δ<sub>C</sub> (100 MHz, D<sub>2</sub>O) 70.8 (1'-CH), 70.3 (3-CHOH), 63.8 (2'-CH<sub>2</sub>OH), 52.3 (2-CH<sub>2</sub>), 47.8 (4-CH), 46.5 (5-CH<sub>2</sub>). LRMS (ESI) 148 (100%). HRMS (ESI) required for C<sub>6</sub>H<sub>14</sub>NO<sub>3</sub> 148.0974, found 148.0987. [α]<sub>D</sub> (c 1.00, MeOH) +6.7 at 25 °C.

### Iminosugar **3**

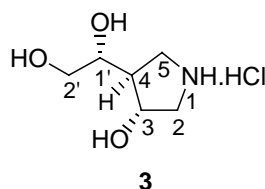

Alcohol **24** (35 mg, 0.12 mmol, 1.0 eq) was stirred in 1 M HCl (2 mL) at 20 °C for 16 h. The resulting pale yellow solution was then concentrated *in vacuo* and the residue purified by

reverse-phase column chromatography (20% MeOH in water). The title compound was obtained as a colourless oil (20 mg, 91%).  $\delta_{\text{H}}$  (400 MHz, D<sub>2</sub>O) 4.39 (1 H, dt,  $J$  5.6 and 4.1 Hz, 3-**CH**OH), 3.78 (1 H, ddd,  $J$  9.6, 6.7 and 4.4 Hz, 1'-CH), 3.59 (1 H, dd,  $J$  11.9 and 4.2 Hz, 2'-**CH**HOH), 3.52 (1 H, dd,  $J$  12.2 and 8.2 Hz, 5-**CH**H), 3.49 (1 H, dd,  $J$  11.9 and 6.9 Hz, 2'-**CH**HOH), 3.43 (1 H, dd,  $J$  12.5 and 5.8 Hz, 2-**CH**H), 3.28 (1 H, dd,  $J$  12.2 and 7.3 Hz, 5-**CH**H), 3.19 (1 H, dd,  $J$  12.5 and 3.7 Hz, 2-**CH**H), 2.34 (1 H, m, 2'-CH).  $\delta_{\text{C}}$  (100 MHz, D<sub>2</sub>O) 71.9 (3-CHOH), 70.2 (4'-CH), 64.1 (2-CH<sub>2</sub>OH), 51.6 (2-**CH**<sub>2</sub>), 47.7 (4-CH), 44.8 (5-CH<sub>2</sub>). LRMS (ESI) 148 (100%). HRMS (ESI) required for C<sub>6</sub>H<sub>14</sub>NO<sub>3</sub> 148.0974, found 148.0983.  $[\alpha]_{\text{D}}$  (c 1.00, MeOH) +31.6 at 28 °C.

Current Data Parameters  
NAME smc503mittig  
EXPNO 1  
PROCNO 1

F2 - Acquisition Parameters  
Date\_ 20040713  
Time 18.39  
INSTRUM av400  
PROBHD 5 mm BBO BB-1H  
PULPROG zg30  
TD 32768  
SOLVENT CDCl3  
NS 16  
DS 2  
SWH 4789.272 Hz  
FIDRES 0.146157 Hz  
AQ 3.4210291 sec  
RG 71.8  
DM 104.400 usec  
DE 6.00 usec  
TE 300.0 K  
D1 1.00000000 sec

===== CHANNEL f1 =====  
NUC1 1H  
P1 7.55 usec  
PL1 0.00 dB  
SF01 400.1322007 MHz

F2 - Processing parameters  
SI 16384  
SF 400.1300059 MHz  
WDW no  
SSB 0  
LB 0.00 Hz  
GB 0  
PC 1.00

1D NMR plot parameters  
CX 30.00 cm  
CY 19.00 cm  
FIP 8.300 ppm  
F1 3321.04 Hz  
F2 0.638 ppm  
F2 255.23 Hz  
PPMCM 0.25540 ppm/cm  
HZCM 1024.19389 Hz/cm

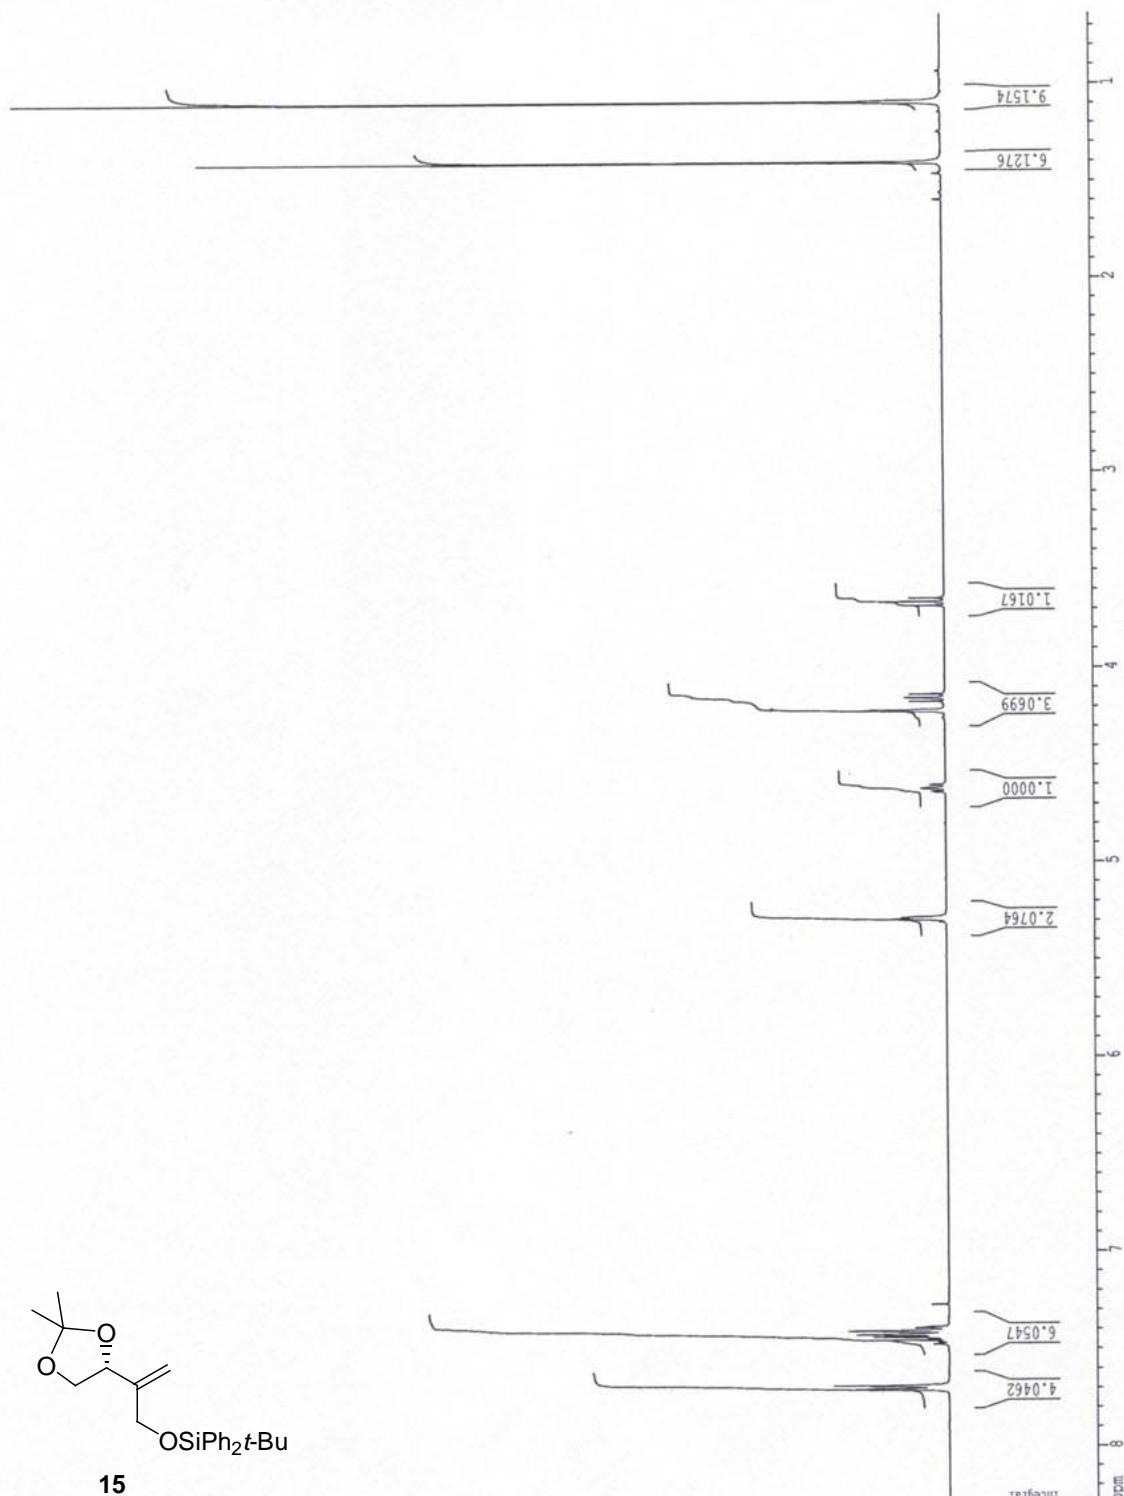

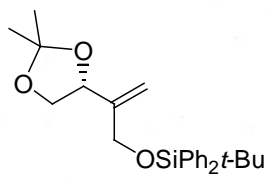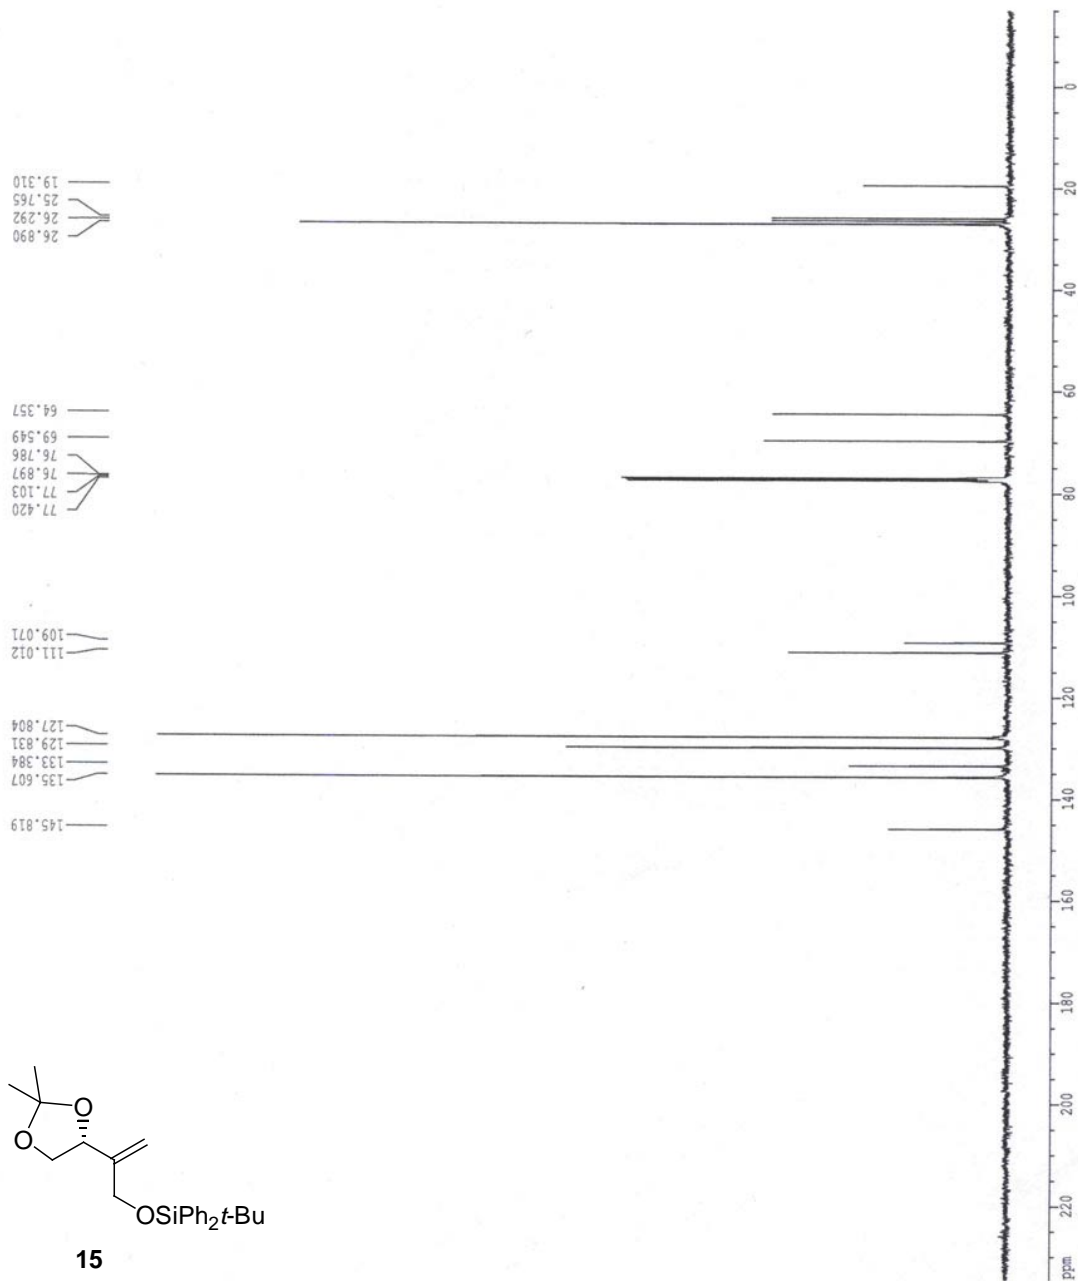

Current Data Parameters  
NAME smc503wittig  
EXPNO 2  
PROCNO 1

F2 - Acquisition Parameters  
Date\_ 20040713  
Time 19.27  
INSTRUM av400  
PROBHD 5 mm BBO BB-1H  
PULPROG zgpg30  
TD 32768  
SOLVENT CDCl3  
NS 960  
DS 2  
SWH 25125.629 Hz  
FIDRES 0.766773 Hz  
AQ 0.6521332 sec  
RG 16384  
DW 19.900 usec  
DE 20.00 usec  
TE 300.0 K  
D1 1.00000000 sec  
d11 0.03000000 sec  
d12 0.00020000 sec  
NUC1 13C  
P1 7.55 usec  
PL1 6.00 dB  
SF01 100.6237959 MHz  
CPDPRG2 waltz16  
NUC2 1H  
PCPD2 87.00 usec  
PL2 0.00 dB  
PL12 21.00 dB  
PL13 26.00 dB  
SF02 400.1316005 MHz

F2 - Processing parameters  
SI 32768  
SF 100.6127630 MHz  
WDW EM  
SSB 0  
LB 3.00 Hz  
GB 0  
PC 1.40

1D NMR plot parameters  
CX 30.00 cm  
CY 19.00 cm  
F1p 245.000 ppm  
F1 24650.13 Hz  
F2p -20.000 ppm  
F2 -2012.26 Hz  
PPMCM 8.83333 ppm/cm  
HZCM 888.74609 Hz/cm

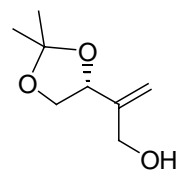

16

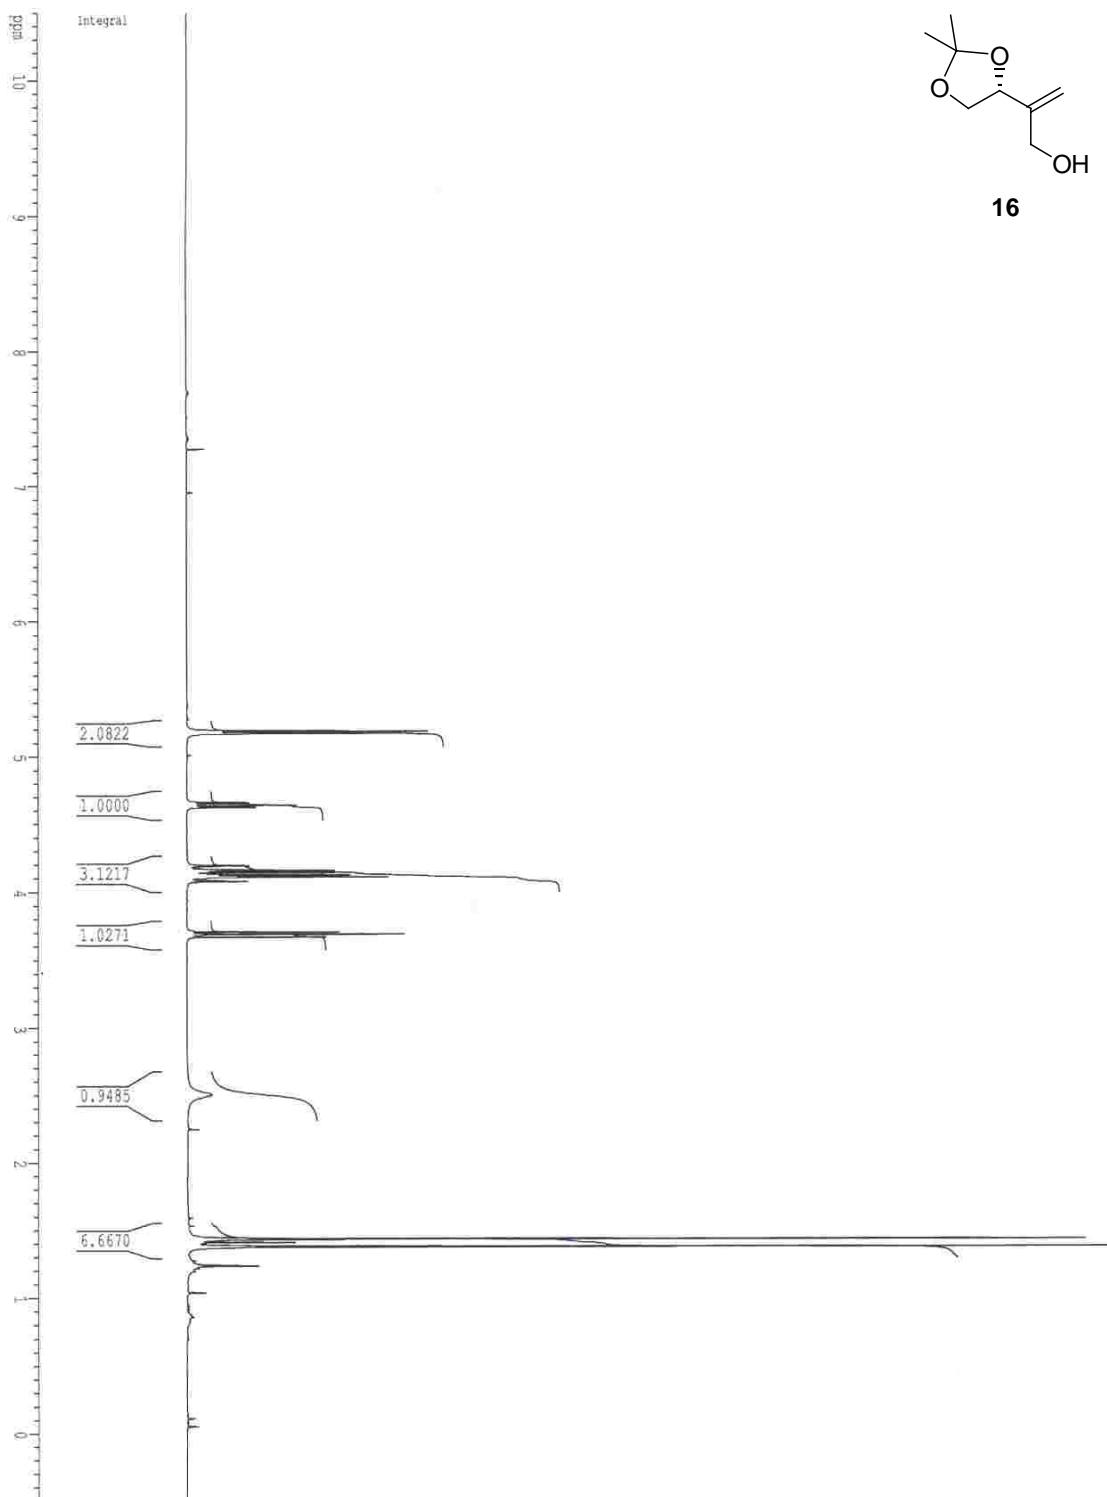

```

Current data parameters
NAME          smc405
EXPNO         2
PROCNO        1

F2 - Acquisition Parameters
Date_         20040312
Time          15.29
INSTRUM       av400
PROBHD        5 mm BBO BB-1H
PULPROG       zg30
TD            32768
SOLVENT       CDCl3
NS            16
DS            2
SWH           4789.272 Hz
FIDRES        0.146157 Hz
AQ            3.4210291 sec
RG            40.3
DM            104.400 usec
DE            6.00 usec
TE            300.0 K
D1            1.00000000 sec

===== CHANNEL f1 =====
NUC1          1H
P1            7.55 usec
PL1           0.00 dB
SE01          400.1322007 MHz

F2 - Processing parameters
SI            16384
SE           400.1300056 MHz
WDW           no
SSB           0
LB            0.00 Hz
GB            0
PC            1.00

1D NMR plot parameters
CX            30.00 cm
CY            19.00 cm
FLP           10.500 ppm
F1            4201.37 Hz
F2            -0.500 ppm
FZ            -200.07 Hz
PM2CM        0.36667 ppm/cm
HZCM         146.71434 Hz/cm

```

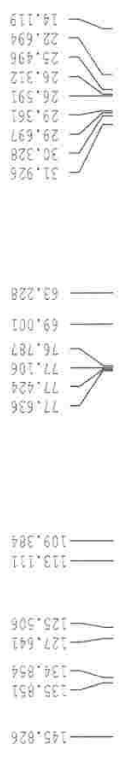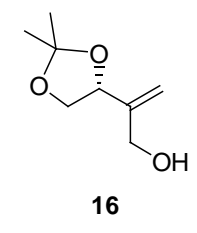

Current Data Parameters  
NAME smc405  
EXPNO 5  
PROCNO 1

F2 - Acquisition Parameters  
Date\_ 20040312  
Time 20.01  
INSTRUM av400  
PROBHD 5 mm BBO BB-1H  
PULPROG zgpg30  
TD 32768  
SOLVENT CDCl3  
NS 1408  
DS 2  
SWH 25125.629 Hz  
FIDRES 0.766773 Hz  
AQ 0.6521332 sec  
RG 16384  
RW 19.900 usec  
DE 20.00 usec  
TE 300.0 K  
D1 1.00000000 sec  
d11 0.03000000 sec  
d12 0.00002000 sec  
NUC1 13C  
P1 7.55 usec  
PL1 6.00 dB  
SFO1 100.6237959 MHz  
CFDPFG2 waltz16  
NUC2 1H  
PCPD2 87.00 usec  
PL2 0.00 dB  
PL12 21.00 dB  
PL13 26.00 dB  
SFO2 400.1316005 MHz

F2 - Processing parameters  
SI 32768  
SF 100.6127653 MHz  
WDW EM  
SSB 0  
LB 3.00 Hz  
GB 0  
PC 1.40

ID NMR plot parameters  
CX 30.00 cm  
CY 12.38 cm  
FIP 245.000 ppm  
F1 24650.13 Hz  
F2 -20.000 ppm  
F2 -2012.26 Hz  
PPMCM 8.83333 ppm/  
HZCM 888.74609 Hz/c

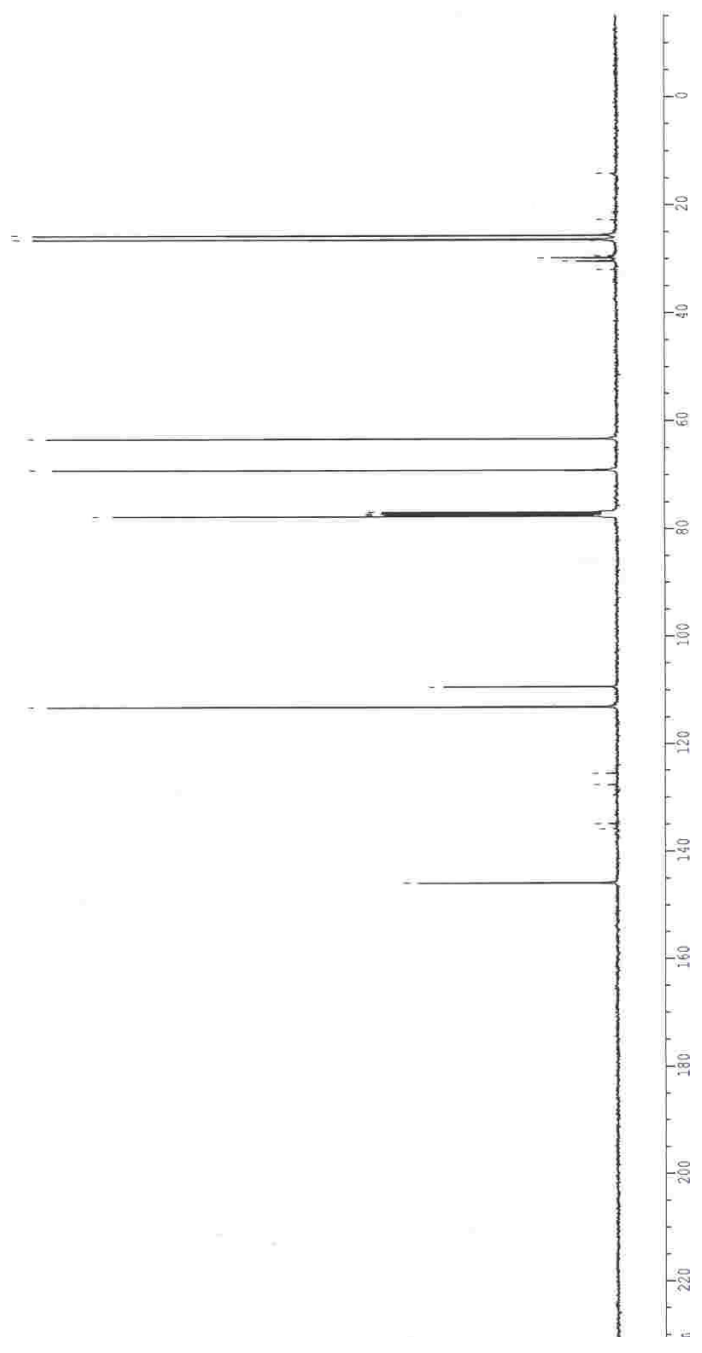



Current Data Parameters  
 NAME smc527  
 EXNO 1  
 PROCNO 1

F2 - Acquisition Parameters  
 Date\_ 20040812  
 Time 18.33  
 INSTRUM av400  
 PROBED 5 mm BBO BB-1H  
 PULPROG zg30  
 TD 32768  
 SOLVENT CDCl3  
 NS 16  
 DS 2  
 SWH 4789.272 Hz  
 FIDRES 0.146157 Hz  
 AQ 3.4210291 sec  
 RG 143.7  
 DW 104.400 usec  
 DE 6.00 usec  
 TE 300.0 K  
 D1 1.00000000 sec

===== CHANNEL f1 =====  
 NUC1 1H  
 P1 7.55 usec  
 PL1 0.00 dB  
 SFO1 400.1322007 MHz  
 F2 - Processing parameters  
 SI 16384  
 SF 400.1300056 MHz  
 WDW no  
 SSB 0  
 LB 0.00 Hz  
 GB 0  
 PC 1.00

1D NMR plot parameters  
 CX 30.00 cm  
 CY 19.00 cm  
 FLIP 7.507 ppm  
 F1 3003.74 Hz  
 F2P 0.606 ppm  
 F2 242.47 Hz  
 PPMCM 0.23003 ppm/cm  
 HZCM 92.04242 Hz/cm

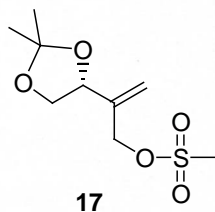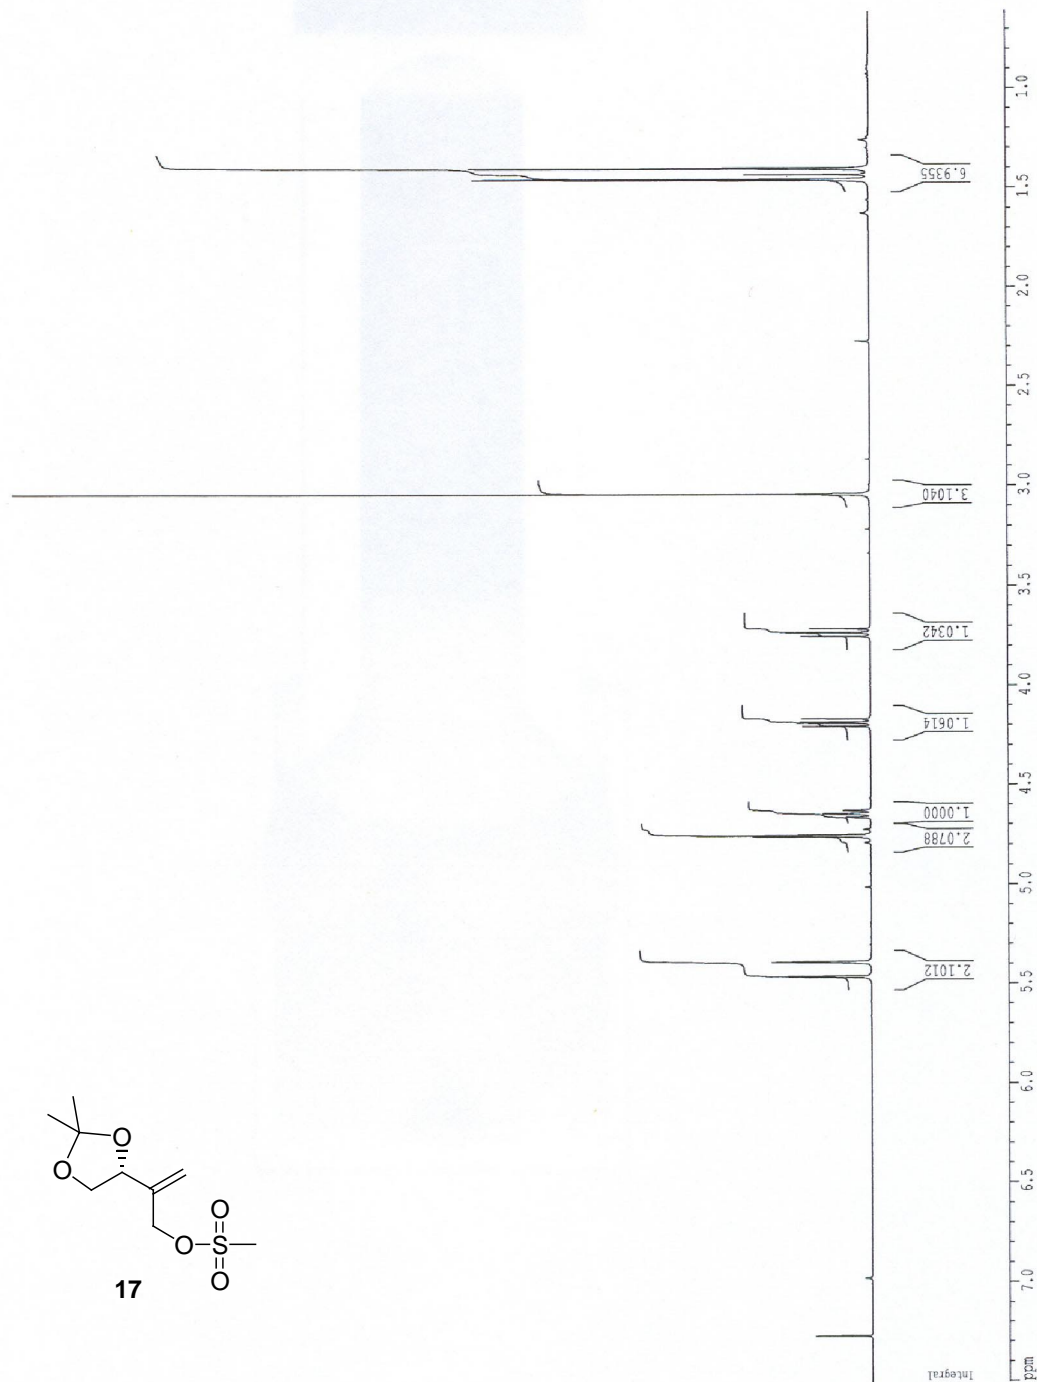

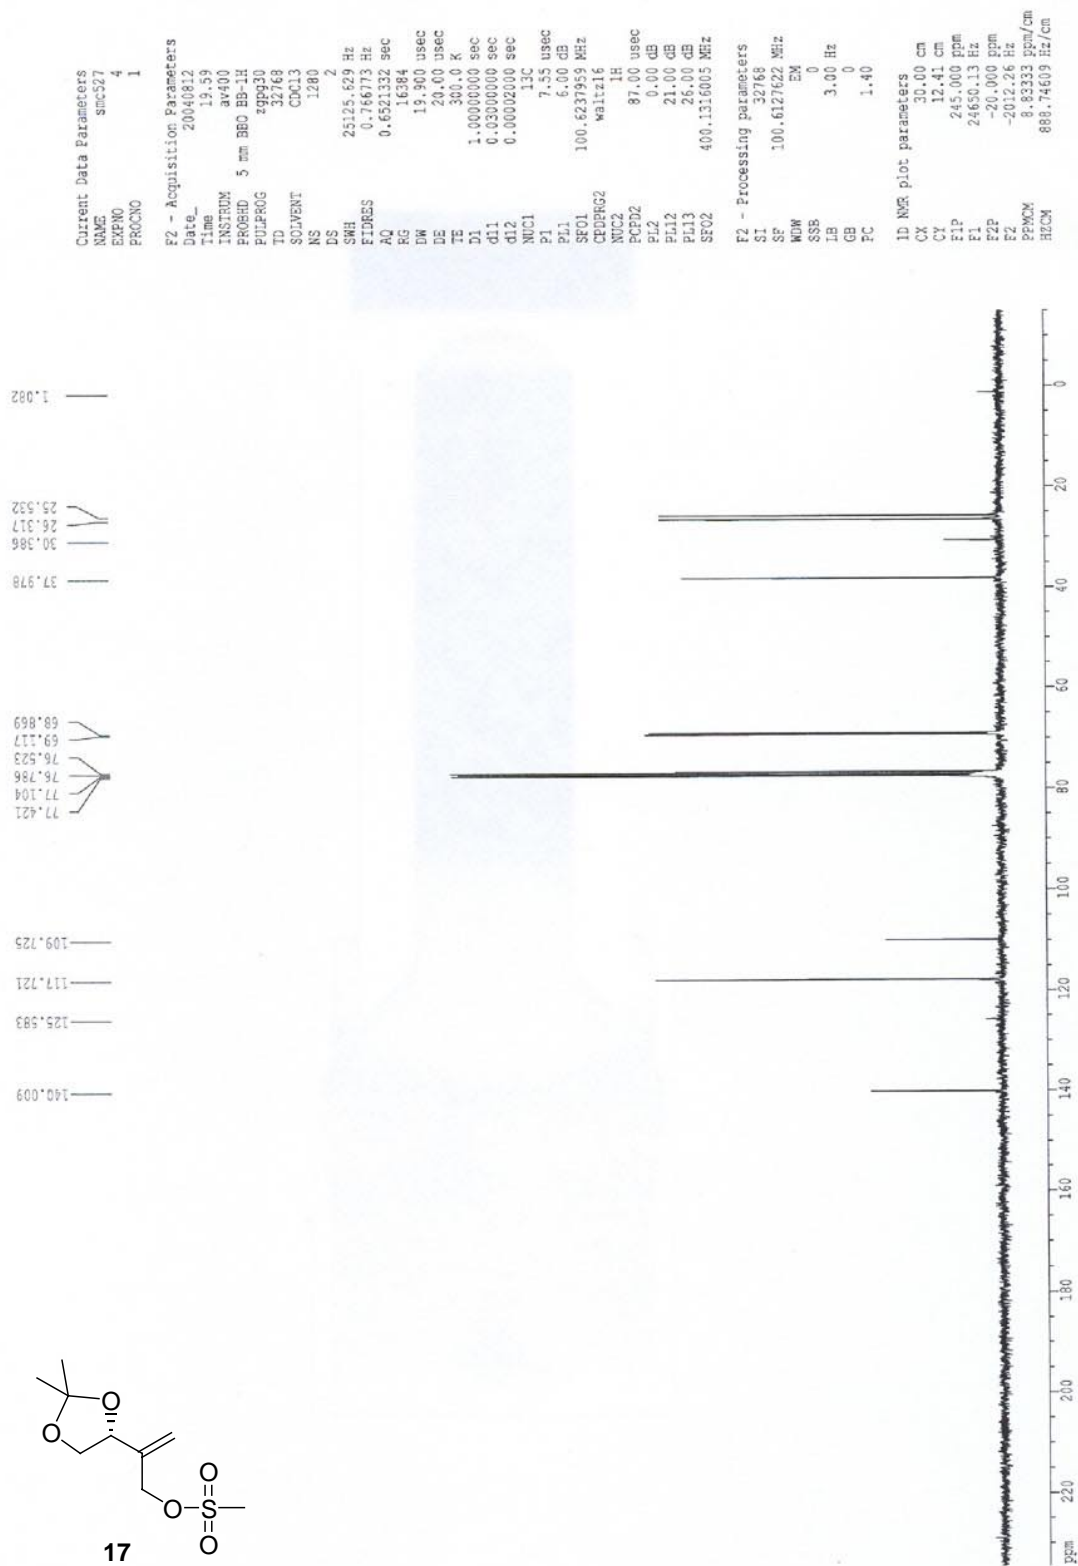

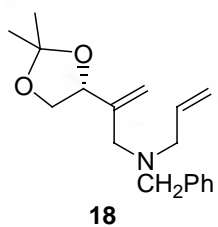

Current Data Parameters  
 NAME smc458  
 EXNO 1  
 PRECNO 1

F2 - Acquisition Parameters  
 Date\_ 20040805  
 Time 19.54  
 INSTRUM av400  
 PROBHD 5 mm BBO BB-1H  
 PULPROG zg30  
 TD 32768  
 SOLVENT CDCl3  
 NS 16  
 DS 2  
 SWH 4789.272 Hz  
 FIDRES 0.146157 Hz  
 AQ 3.4210291 sec  
 RG 40.3  
 DM 104.400 usec  
 DE 5.00 usec  
 TE 300.0 K  
 D1 1.00000000 sec

===== CHANNEL f1 =====  
 NUC1 1H  
 P1 7.55 usec  
 PL1 0.00 dB  
 SF01 400.1322007 MHz

F2 - Processing parameters  
 SI 16384  
 SF 400.1300056 MHz  
 WDW no  
 SSB 0  
 LB 0.00 Hz  
 GB 0  
 PC 1.00

1D NMR plot parameters  
 CX 30.00 cm  
 CT 19.00 cm  
 FIP 7.747 ppm  
 F1 3099.76 Hz  
 F2 1.024 ppm  
 F2 409.76 Hz  
 PPMCM 0.22409 ppm/cm  
 HZCM 89.66672 Hz/cm

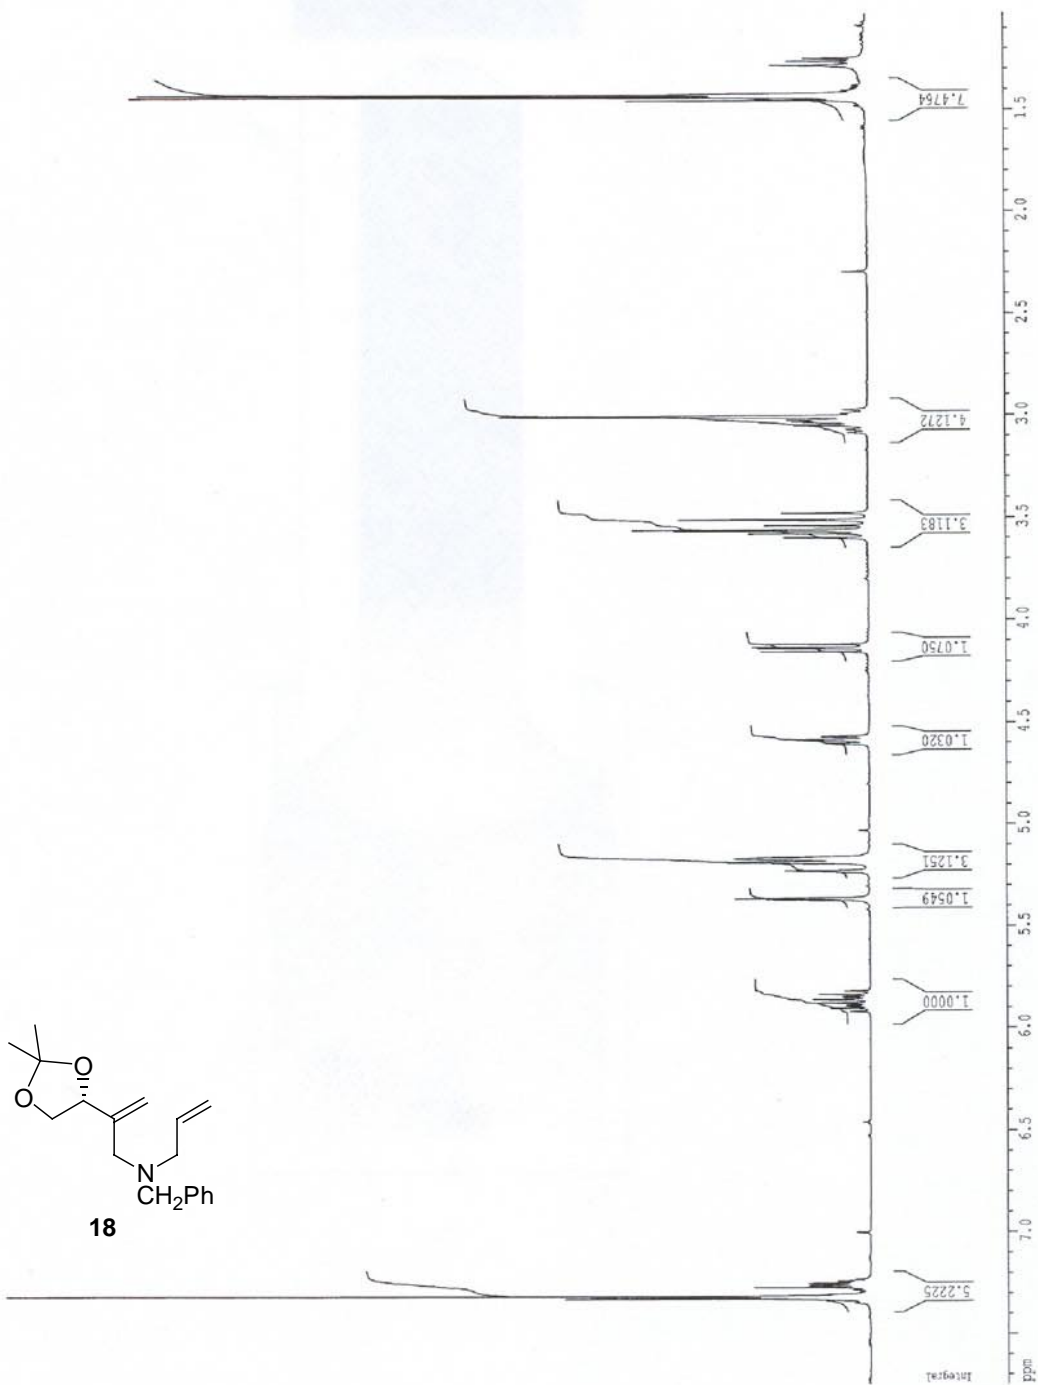

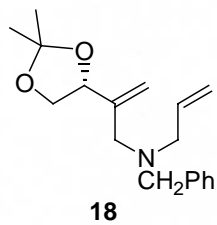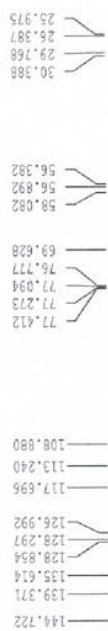

ppm

Current Data Parameters  
 NAME: SMC458  
 EXPNO: 4  
 PROCNO: 1

F2 - Acquisition Parameters  
 Date\_: 20040806  
 Time: 8.56  
 INSTRUM: av400  
 PROBRD: 5 mm BBO BB-1H  
 FUPROG: zgpg30  
 TD: 32768  
 SOLVENT: CDCl3  
 NS: 14848  
 DS: 2  
 SWH: 25125.629 Hz  
 FIDRES: 0.766773 Hz  
 AQ: 0.6521332 sec  
 RG: 16384  
 DM: 19.960 usec  
 DE: 20.000 usec  
 TE: 300.0 K  
 D1: 1.00000000 sec  
 d11: 0.03000000 sec  
 d12: 0.00002000 sec  
 NUC1: 13C  
 P1: 7.55 usec  
 PL1: 6.00 dB  
 SF01: 100.623959 MHz  
 CDPORG2: waltz16  
 NUC2: 1H  
 PCPD2: 87.00 usec  
 PL2: 0.00 dB  
 PL12: 21.00 dB  
 PL13: 26.00 dB  
 SF02: 400.1316005 MHz

F2 - Processing parameters  
 SI: 32768  
 SF: 100.6127645 MHz  
 EN: 0  
 NUCN: 1H  
 SSB: 0  
 LB: 3.00 Hz  
 GB: 0  
 PC: 1.40

1D NMR plot parameters  
 CX: 30.00 cm  
 CY: 13.76 cm  
 P1P: 245.000 ppm  
 F1: 24650.13 Hz  
 F2P: -20.000 ppm  
 F2: -2012.26 Hz  
 FFCN: 6.83333 ppm/cm  
 HZCN: 886.74609 Hz/cm

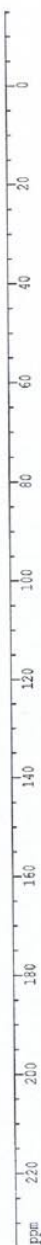

Current Data Parameters  
 NAME smc465  
 EXNO 1  
 PROCNO 1

F2 - Acquisition Parameters

Date\_ 20040716  
 Time 19.10  
 INSTRUM aw400  
 PROBD 5 mm BBO BB-1H  
 PULPROG zg30  
 TD 32768  
 SOLVENT CDCl3  
 NS 16  
 DS 2  
 SWH 4789.272 Hz  
 FIDRES 0.146157 Hz  
 AQ 3.4210291 sec  
 RG 322.5  
 DM 104.400 usec  
 DE 6.00 usec  
 TE 300.0 K  
 D1 1.00000000 sec

===== CHANNEL f1 =====  
 NUC1 1H  
 P1 7.55 usec  
 PL1 0.00 dB  
 SF01 400.1322007 MHz

F2 - Processing parameters  
 SI 16384  
 SF 400.1300059 MHz  
 WDW no  
 SSB 0  
 LB 0.00 Hz  
 GB 0  
 PC 1.00

1D NMR plot parameters  
 CX 30.00 cm  
 CI 19.00 cm  
 FI 7.964 ppm  
 F1 3186.53 Hz  
 F2 1.002 ppm  
 F2 400.98 Hz  
 F2MCM 0.23205 ppm/cm  
 HZCM 92.83154 Hz/cm

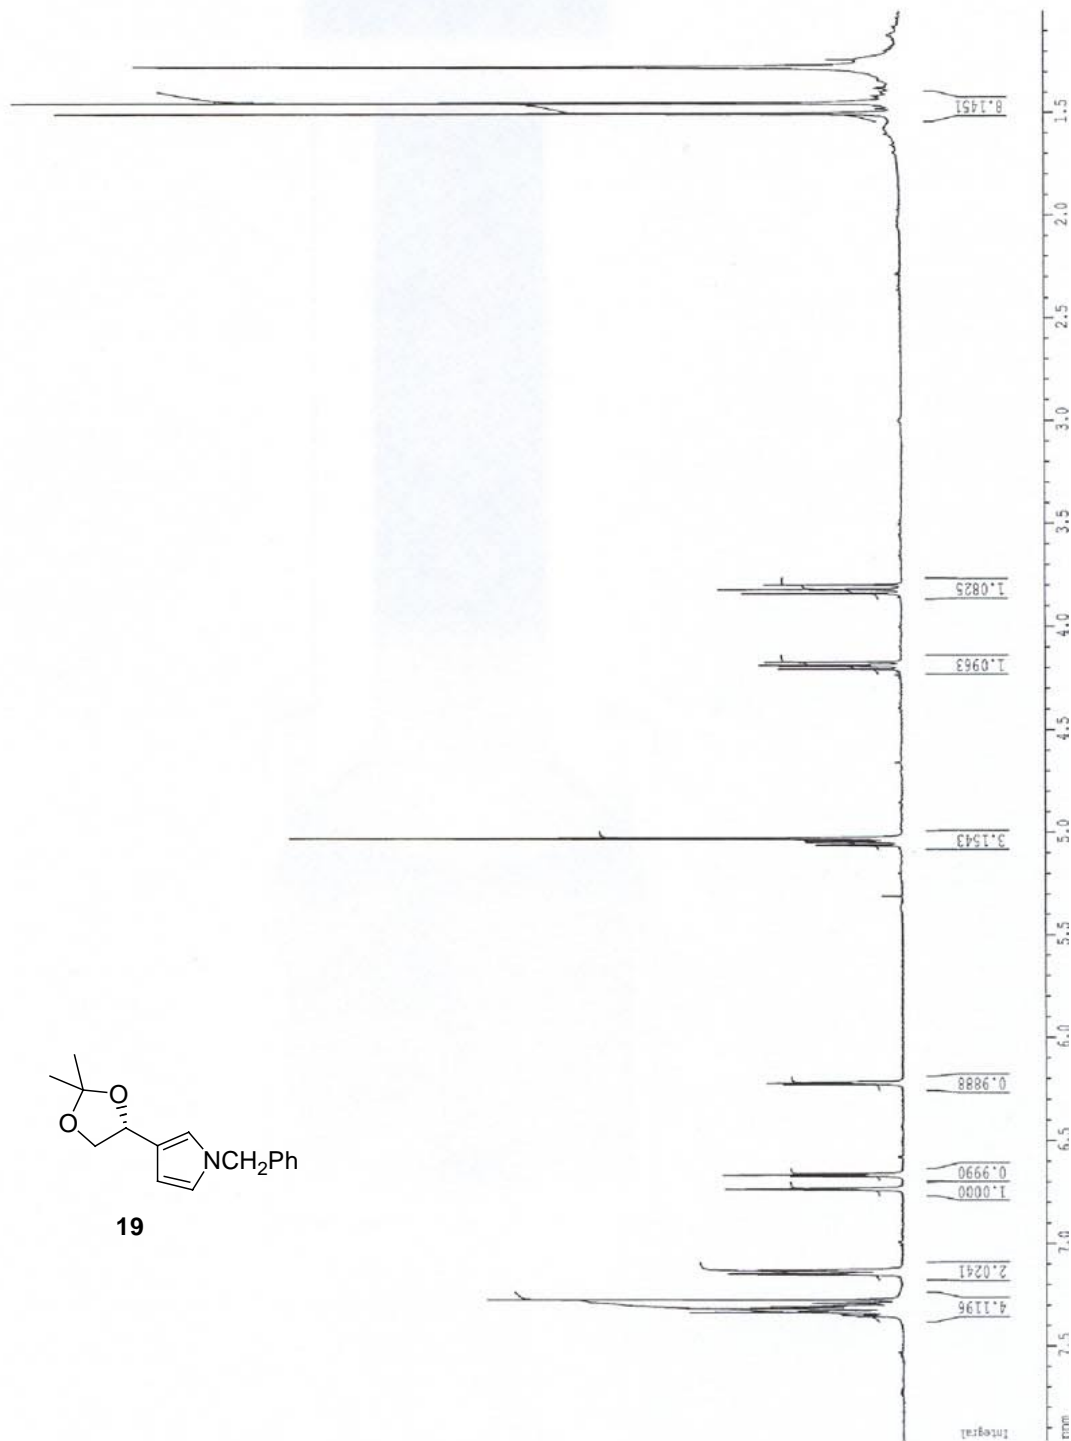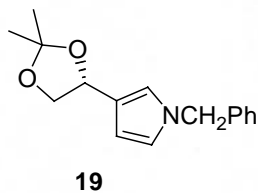

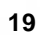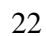

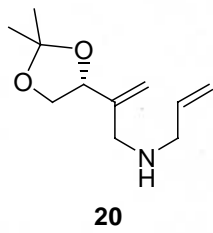

Current Data Parameters  
 NAME sm0512  
 EXPNO 1  
 PROCNO 1

F2 - Acquisition Parameters  
 Date\_ 20040720  
 Time 19.51  
 INSTRUM aw400  
 PROBHD 5 mm BBO BB-H  
 PULPROG zg30  
 TD 32768  
 SOLVENT CDCl3  
 NS 16  
 DS 2  
 SWH 4769.272 Hz  
 FIDRES 0.146157 Hz  
 AQ 3.4210291 sec  
 RG 90.5  
 DW 104.400 usec  
 DE 6.00 usec  
 TE 300.0 K  
 D1 1.00000000 sec

===== CHANNEL f1 =====  
 NUC1 1H  
 P1 7.55 usec  
 PL1 0.00 dB  
 SF01 400.1322007 MHz

F2 - Processing parameters  
 SI 16384  
 SF 400.1300056 MHz  
 MDW no  
 SSB 0  
 LB 0.00 Hz  
 GB 0  
 PC 1.00

1D NMR plot parameters  
 CX 30.00 cm  
 C1 19.00 cm  
 F1P 7.572 ppm  
 F1 3029.65 Hz  
 F2P 0.949 ppm  
 F2 379.78 Hz  
 PPMCM 0.22075 ppm/cm  
 HZCM 88.32909 Hz/cm

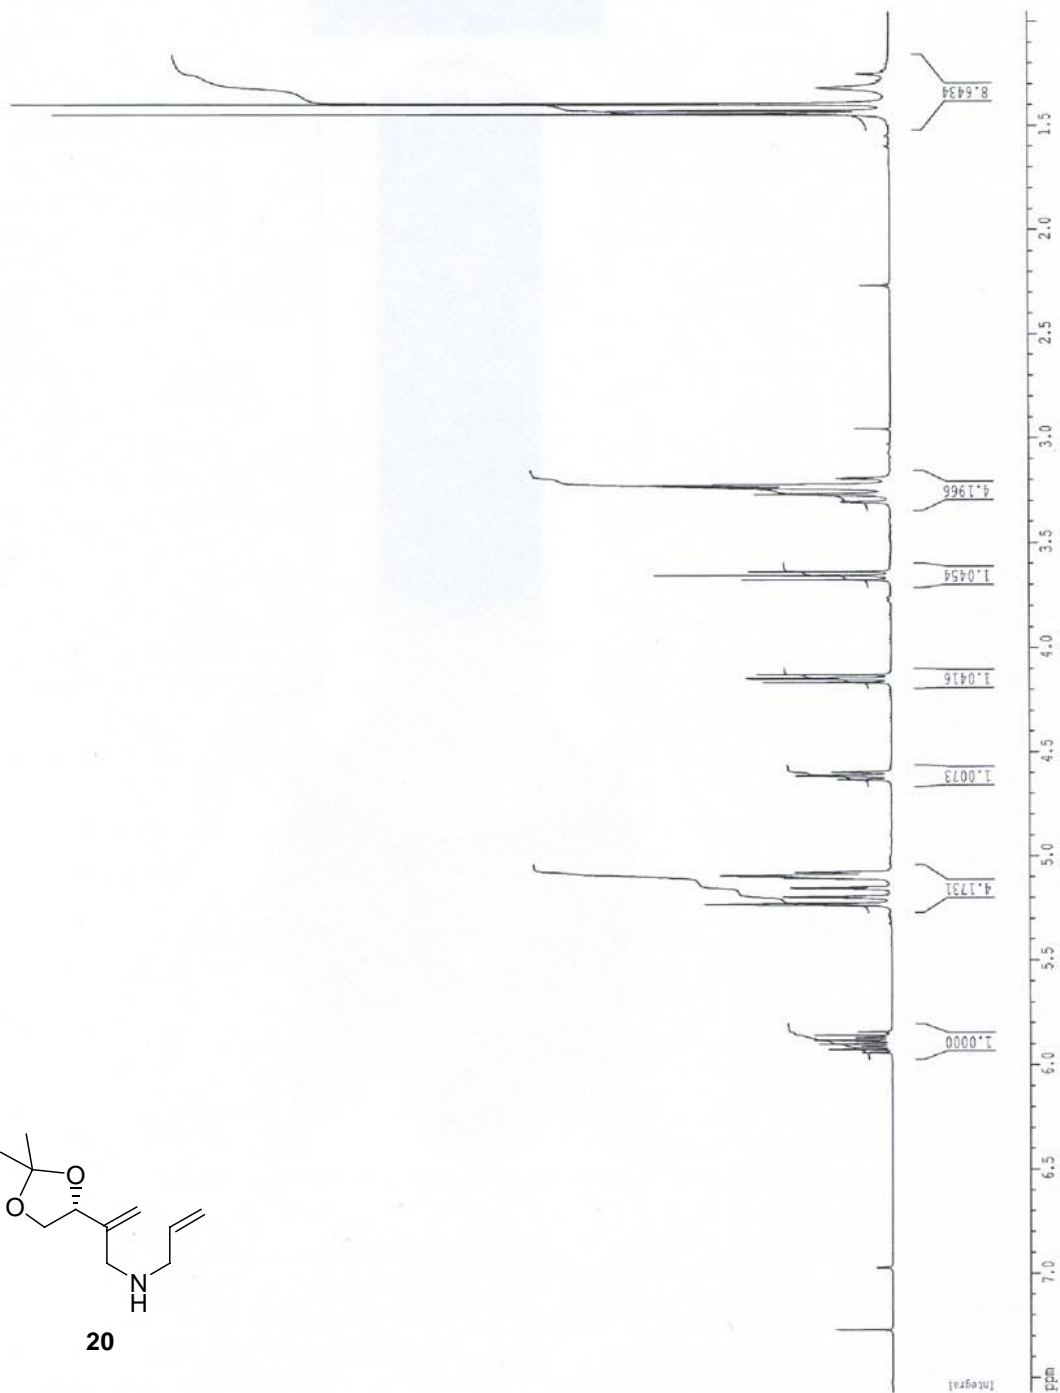



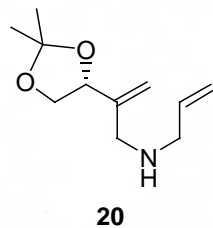

20

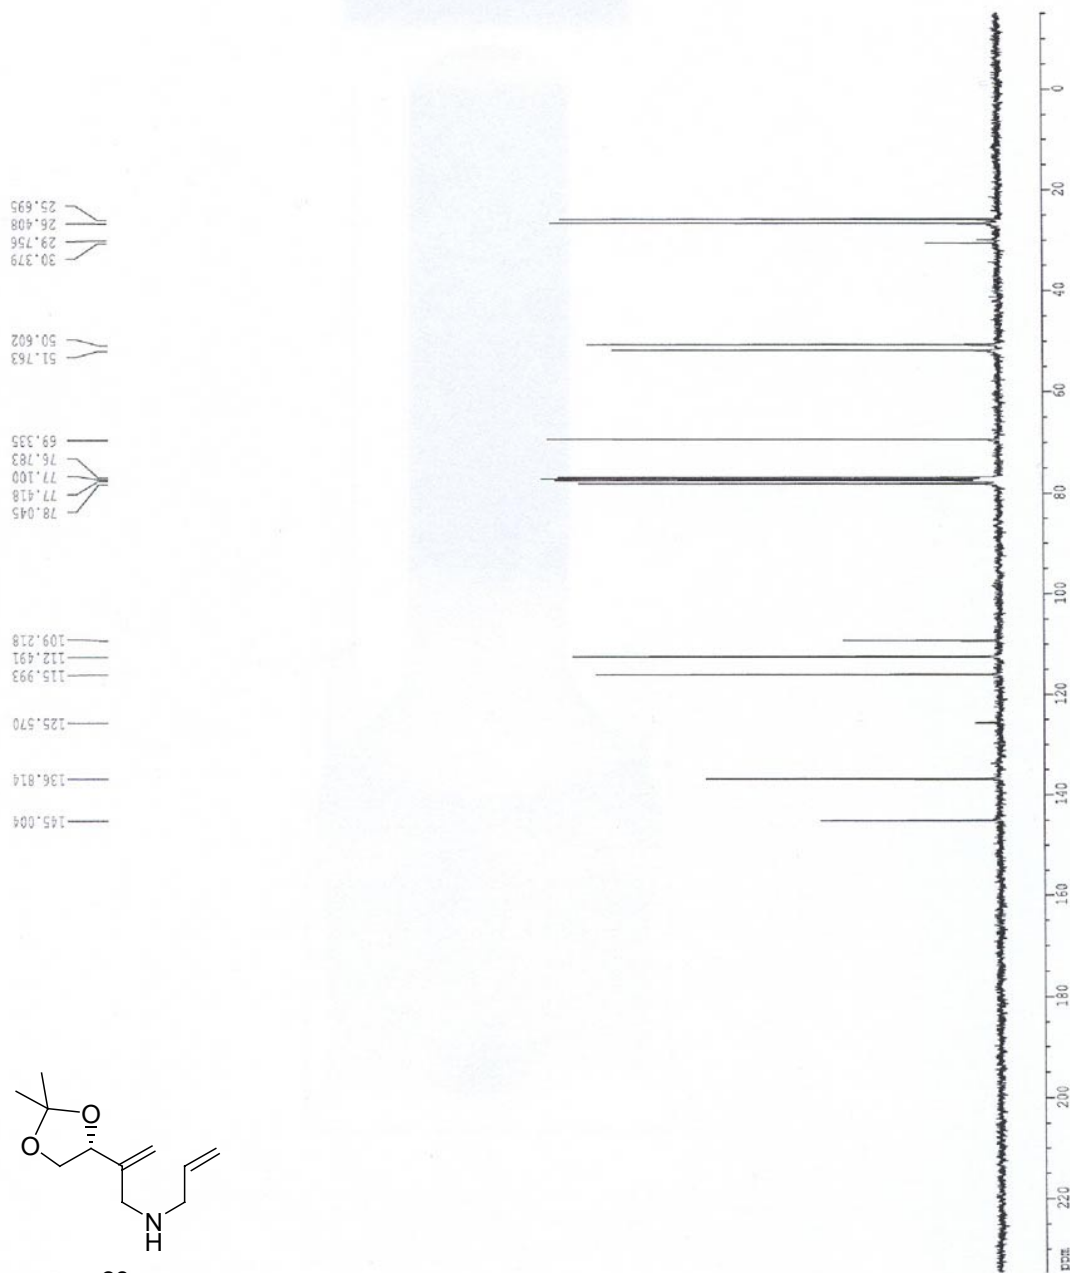

Current Data Parameters  
NAME sm512  
EXPNO 4  
PROCNO 1

F2 - Acquisition Parameters  
Date\_ 20040720  
Time 21.28  
INSTRUM av400  
PROBHD 5 mm BBO BB-1H  
PULPROG zgpg30  
TD 32768  
SOLVENT CDCl<sub>3</sub>  
NS 1344  
DS 2  
SWH 25125.629 Hz  
FIDRES 0.766773 Hz  
AQ 0.6521332 sec  
RG 16384  
RW 19.900 usec  
DE 20.00 usec  
TE 300.0 K  
d11 1.00000000 sec  
d12 0.03000000 sec  
NUC1 13C  
P1 7.55 usec  
PL1 6.00 dB  
SFO1 100.627959 MHz  
CPOPRG2 waltz16  
NUC2 1H  
PCPD2 87.00 usec  
PL2 0.00 dB  
PL12 21.00 dB  
PL13 26.00 dB  
SFO2 400.1316005 MHz

F2 - Processing parameters  
SI 32768  
SF 100.627959 MHz  
WDW EM  
SSB 0  
LB 3.00 Hz  
GB 0  
PC 1.40

1D NMR plot parameters  
CX 30.00 cm  
CY 10.26 cm  
F1P 245.000 ppm  
F1 24650.13 Hz  
F2P -20.000 ppm  
F2 -2012.26 Hz  
PPMCN 8.83333 ppm/cm  
HZCM 888.74609 Hz/cm



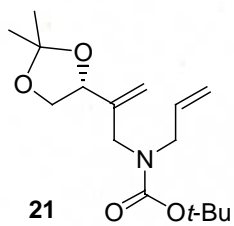

Current Data Parameters  
 NAME smc513  
 EXPNO 1  
 PROCNO 1

F2 - Acquisition Parameters  
 Date\_ 20040721  
 Time 20.03  
 INSTRUM av400  
 PROBHD 5 mm BBO BB-1H  
 PULPROG zg30  
 TD 32768  
 SOLVENT CDCl3  
 NS 16  
 DS 2  
 SWH 4789.272 Hz  
 FIDRES 0.146157 Hz  
 AQ 3.4210291 sec  
 RG 40.3  
 DW 104.400 usec  
 DE 6.00 usec  
 TE 300.0 K  
 D1 1.00000000 sec

===== CHANNEL f1 =====  
 NUC1 1H  
 P1 7.55 usec  
 PL1 0.00 dB  
 SF01 400.1322007 MHz

F2 - Processing parameters  
 S1 16384  
 SF 400.1300053 MHz  
 WDW no  
 SSB 0  
 LB 0.00 Hz  
 GB 0  
 PC 1.00

1D NMR plot parameters  
 CX 30.00 cm  
 CY 57.68 cm  
 FIP 7.611 ppm  
 FI 3045.21 Hz  
 F2P 0.396 ppm  
 FZ 398.47 Hz  
 PPMX 0.22049 ppm/cm  
 HZCX 88.22168 Hz/cm

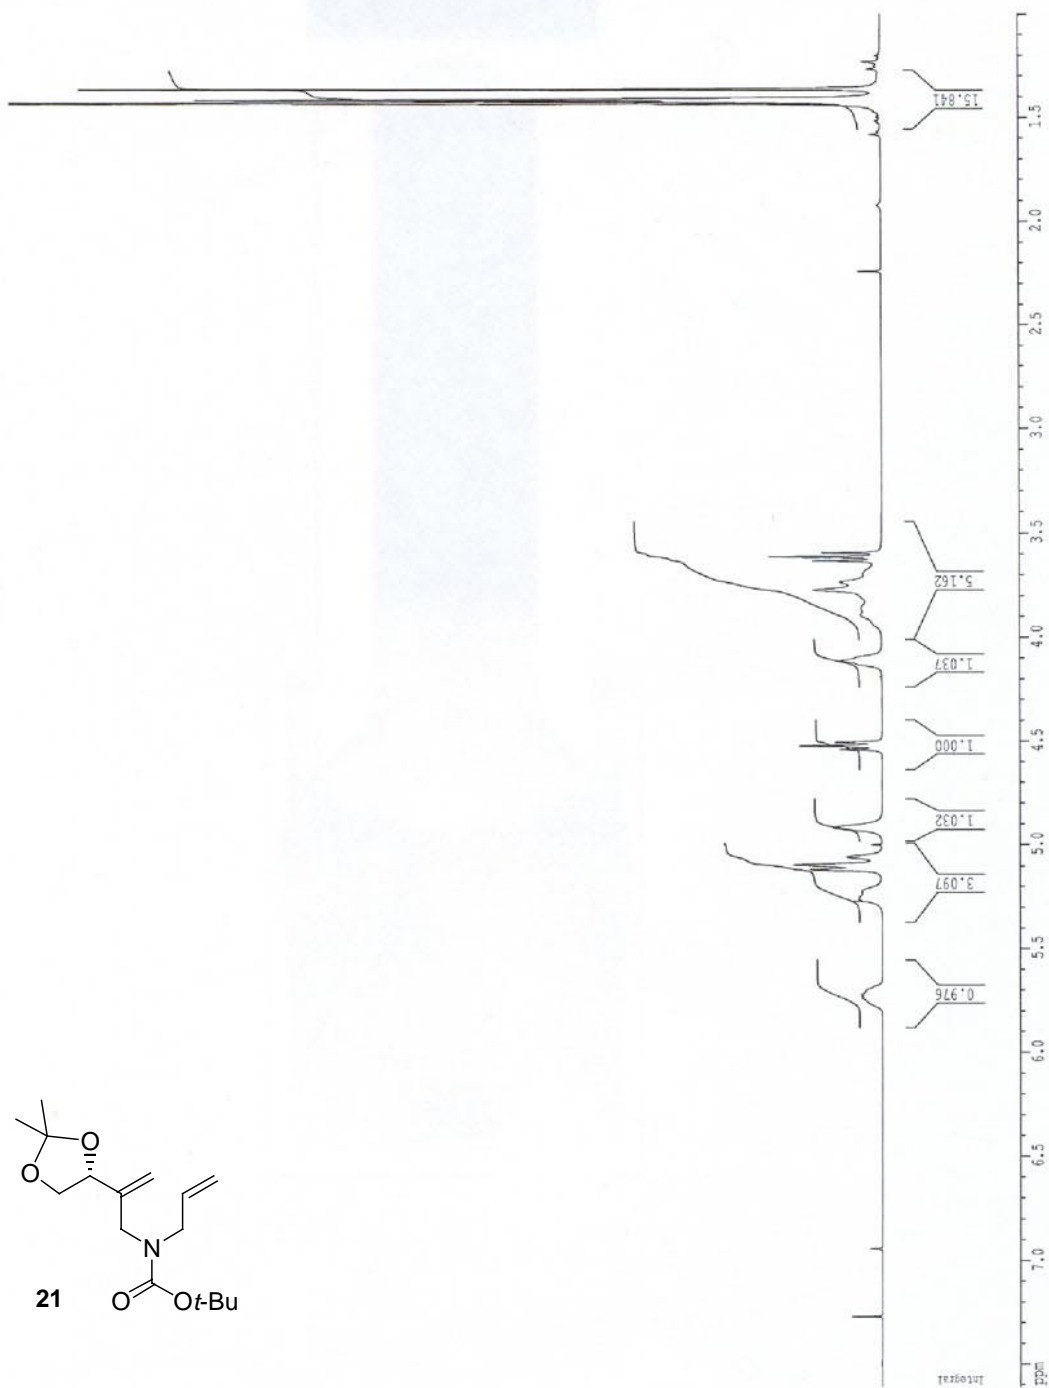

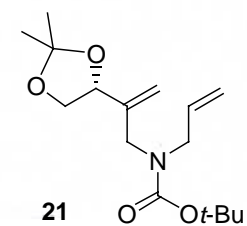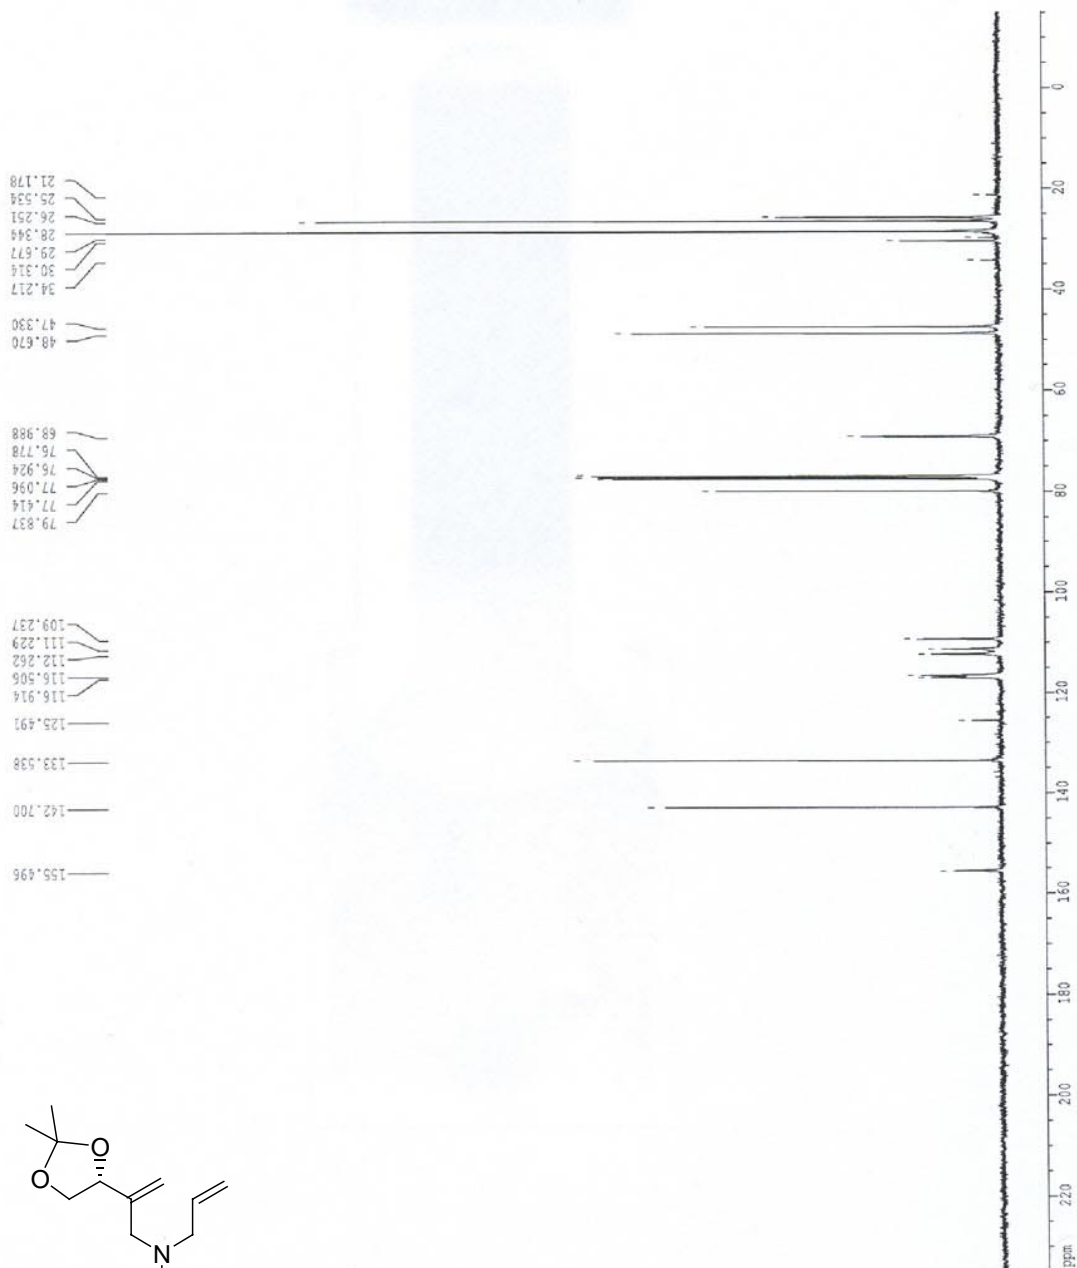

Current Data Parameters

| NAME   | VALUE |
|--------|-------|
| EXPNO  | 4     |
| PROCNO | 1     |

F2 - Acquisition Parameters

| Parameter | Value           |
|-----------|-----------------|
| Date_     | 20040721        |
| Time      | 21.29           |
| INSTRUM   | xy400           |
| PROBHD    | 5 mm BBO BB-1H  |
| PULPROG   | zgpg30          |
| TD        | 32768           |
| SOLVENT   | CDCl3           |
| NS        | 1280            |
| DS        | 2               |
| SWH       | 25125.629 Hz    |
| FIDRES    | 0.766773 Hz     |
| AQ        | 0.6521332 sec   |
| RG        | 16384           |
| DW        | 19.900 usec     |
| DE        | 20.00 usec      |
| TE        | 300.0 K         |
| d1        | 1.00000000 sec  |
| d12       | 0.03000000 sec  |
| d13       | 0.00020000 sec  |
| NUC1      | 13C             |
| PC1       | 7.55 usec       |
| PL1       | 6.00 dB         |
| SFO1      | 100.6237959 MHz |
| CPDPRG2   | waltz16         |
| NUC2      | 1H              |
| PCPD2     | 87.00 usec      |
| PL2       | 0.00 dB         |
| PL12      | 21.00 dB        |
| PL13      | 26.00 dB        |
| SFO2      | 400.1316005 MHz |

F2 - Processing parameters

| Parameter | Value           |
|-----------|-----------------|
| SI        | 32768           |
| SF        | 100.6127661 MHz |
| WDW       | EM              |
| SSB       | 0               |
| LB        | 3.00 Hz         |
| GB        | 0               |
| PC        | 1.40            |

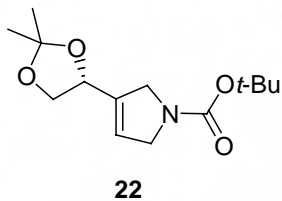

Current Data Parameters  
 NAME smc523-2  
 EXPNO 2  
 PROCNO 1

F2 - Acquisition Parameters  
 Date\_ 20040814  
 Time 19:59  
 INSTRUM av400  
 PROBHD 5 mm BBO BB-1H  
 PULPROG zg30  
 TD 32768  
 SOLVENT CDCl3  
 NS 16  
 DS 2  
 SWH 4789.272 Hz  
 FIDRES 0.146157 Hz  
 AQ 3.4210291 sec  
 RG 40.3  
 DW 104.400 usec  
 DE 6.00 usec  
 TE 300.0 K  
 D1 1.0000000 sec

===== CHANNEL f1 =====  
 NUC1 <sup>1</sup>H  
 P1 7.55 usec  
 PL1 0.00 dB  
 SF01 400.1322007 MHz

F2 - Processing parameters  
 SI 16384  
 SF 400.1300050 MHz  
 WDW HO  
 SSB 0  
 LB 0.00 Hz  
 GB 0  
 PC 1.00

1D NMR plot parameters  
 CX 30.00 cm  
 CY 63.36 cm  
 F1P 7.835 ppm  
 F1 3134.83 Hz  
 F2P 0.967 ppm  
 F2 386.89 Hz  
 FPMCM 0.22892 ppm/cm  
 HZCM 91.59910 Hz/cm

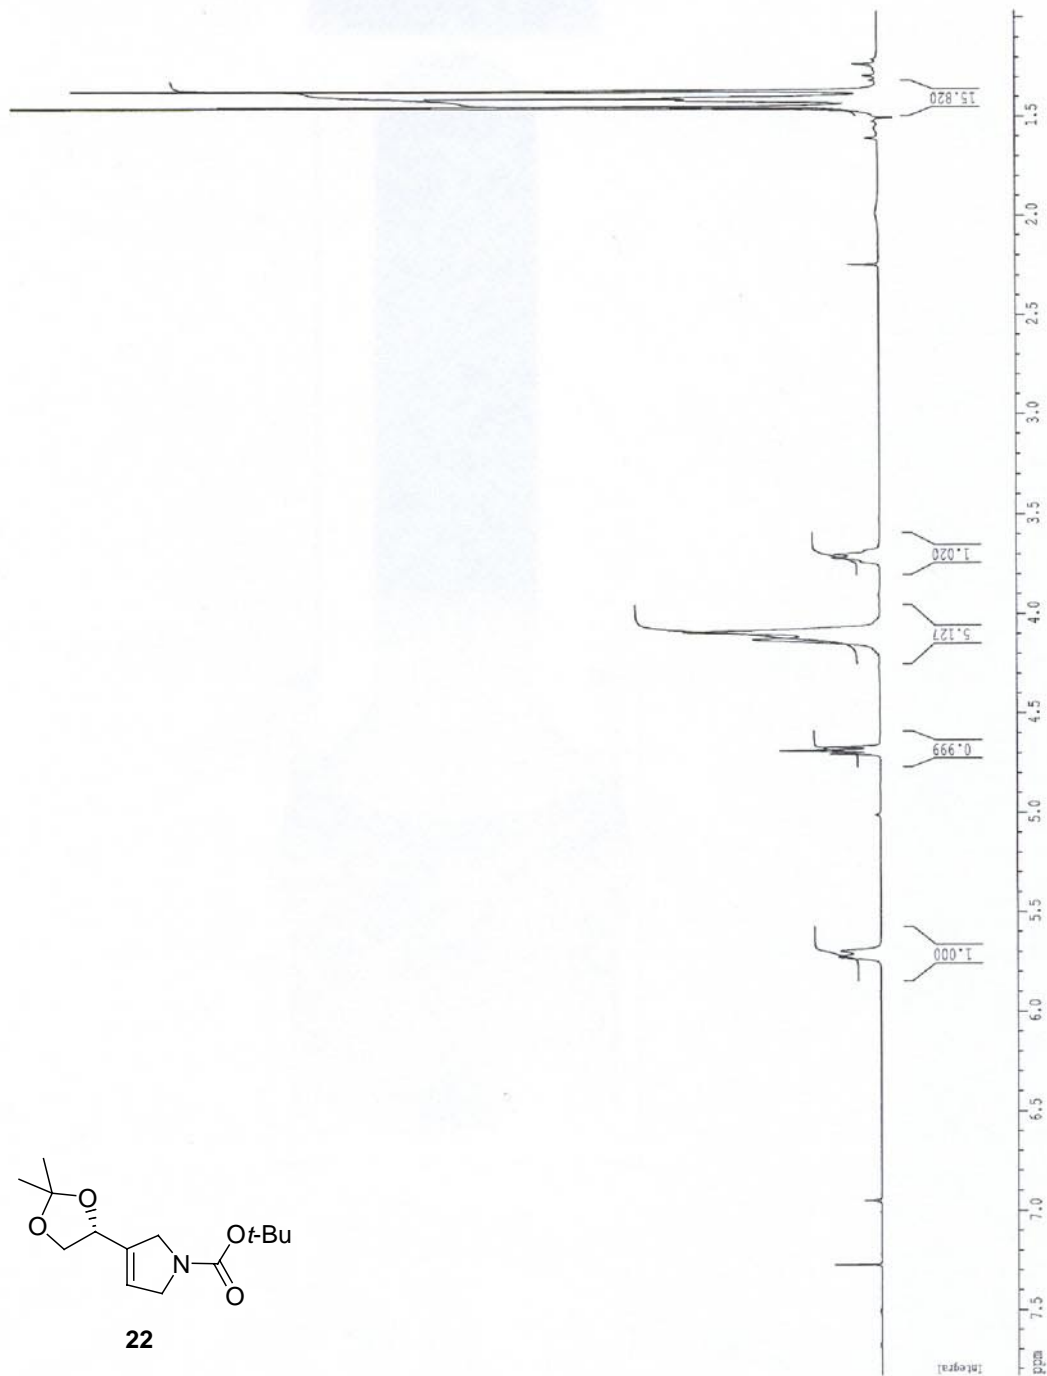

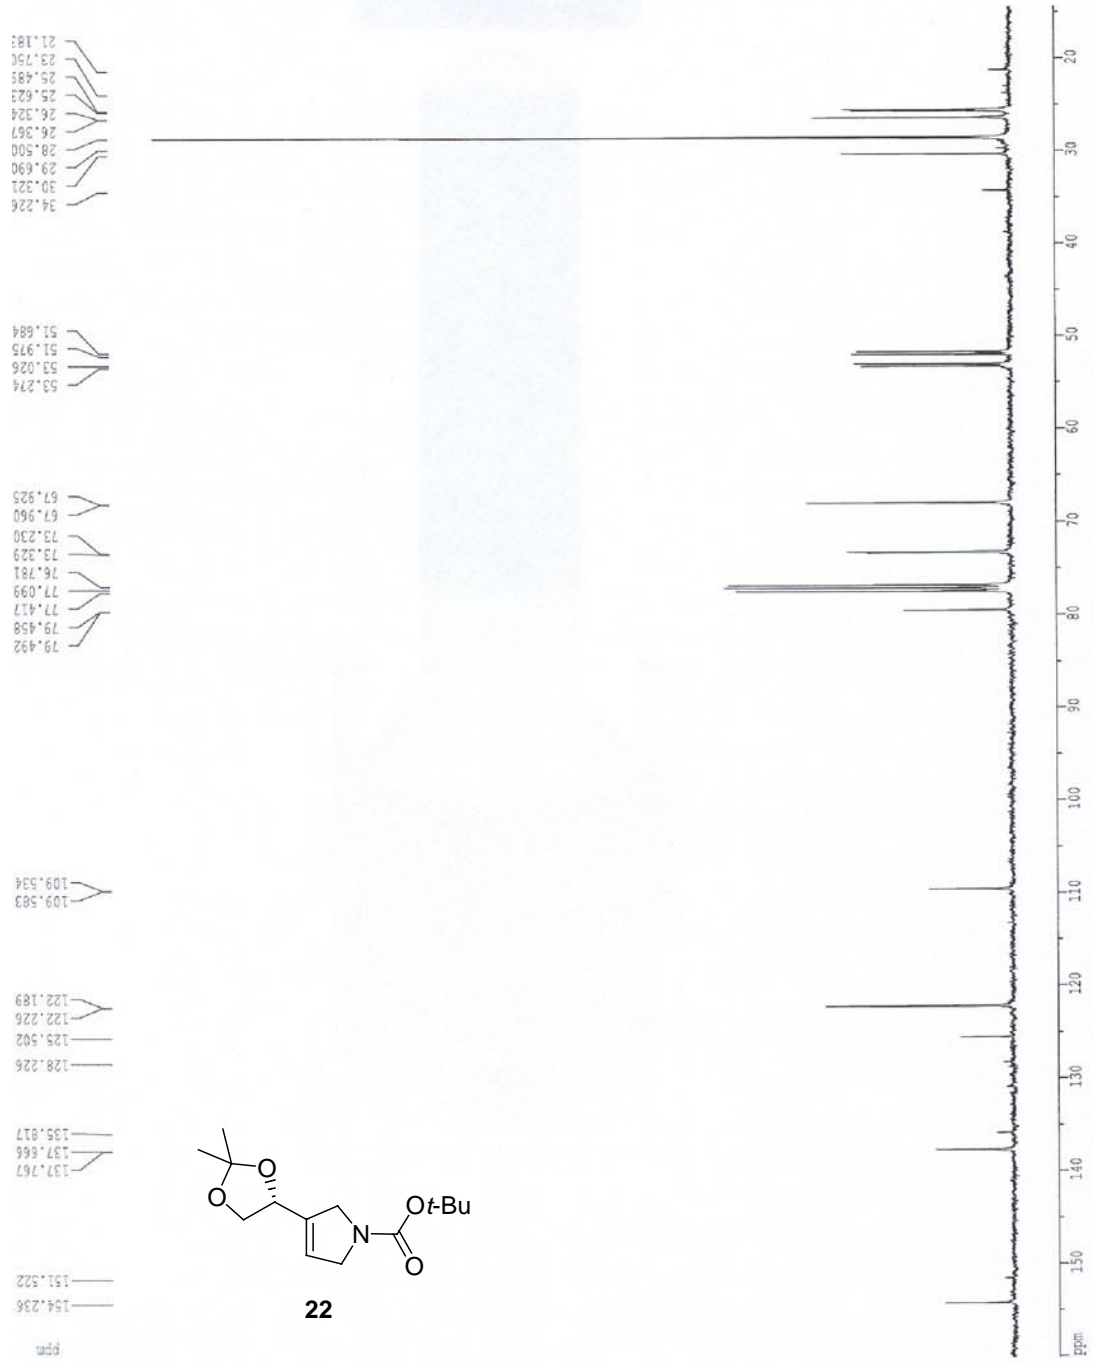

Current Data Parameters  
NAME smc523  
EXPNO 2  
PROCNO 1

F2 - Acquisition Parameters  
Date\_ 20040813  
Time 21.14  
INSTRUM av400  
PROBHD 5 mm BBO BB-1H  
PULPROG zgpg30  
TD 32768  
SOLVENT CDCl3  
NS 640  
DS 2  
SWH 25125.629 Hz  
FIDRES 0.766173 Hz  
AQ 0.6521332 sec  
RG 16384  
DM 19.900 usec  
DE 20.00 usec  
TE 300.0 K  
d1 1.00000000 sec  
d11 0.03000000 sec  
d12 0.00020000 sec  
NUC1 13C  
P1 7.55 usec  
PL1 5.00 dB  
SFO1 100.6237959 MHz  
CFDPRG2 waltz16  
NUC2 1H  
PCPD2 87.00 usec  
PL2 0.00 dB  
PL12 21.00 dB  
PL13 26.00 dB  
SFO2 400.1316005 MHz

F2 - Processing parameters  
SI 32768  
SF 100.6127661 MHz  
WDW EM  
SSB 0  
LB 3.00 Hz  
GB 0  
PC 1.40

1D NMR plot parameters  
CX 30.00 cm  
CY 19.00 cm  
FIP 160.170 ppm  
F1 16115.16 Hz  
F2P 14.365 ppm  
F2 1445.34 Hz  
PQCM 4.86016 ppm/cm  
HZCM 488.99396 Hz/cm

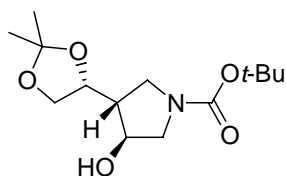

23

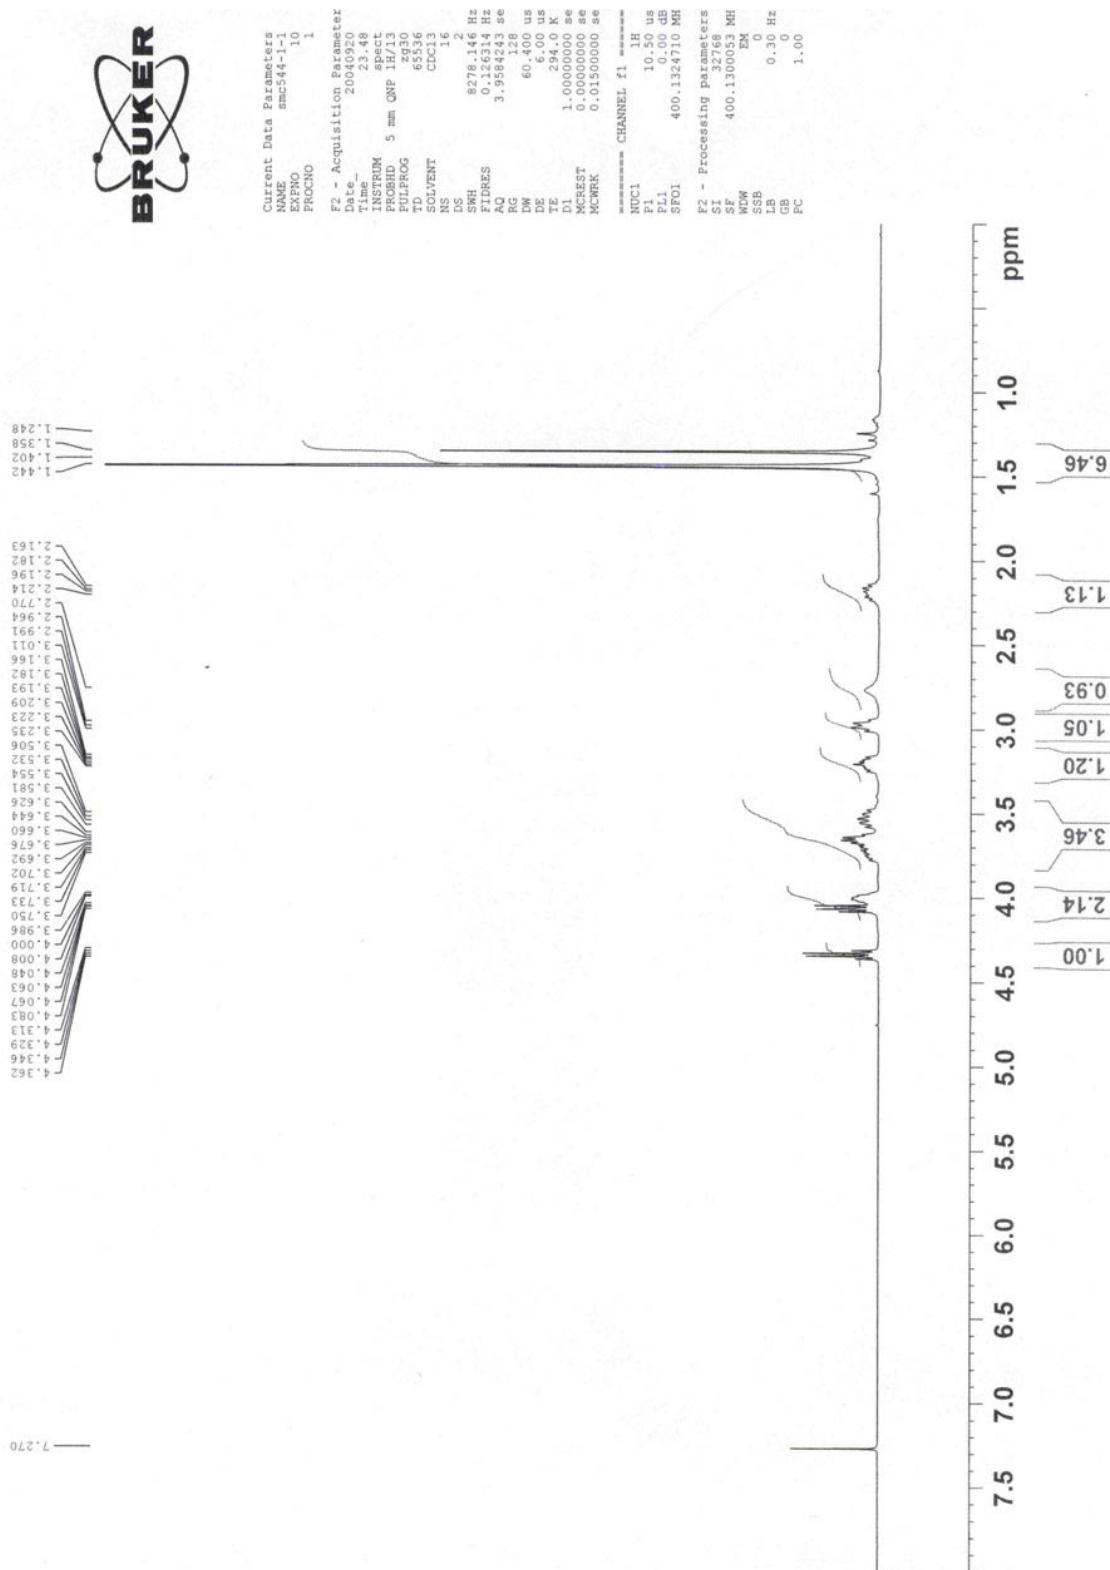

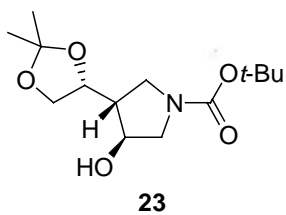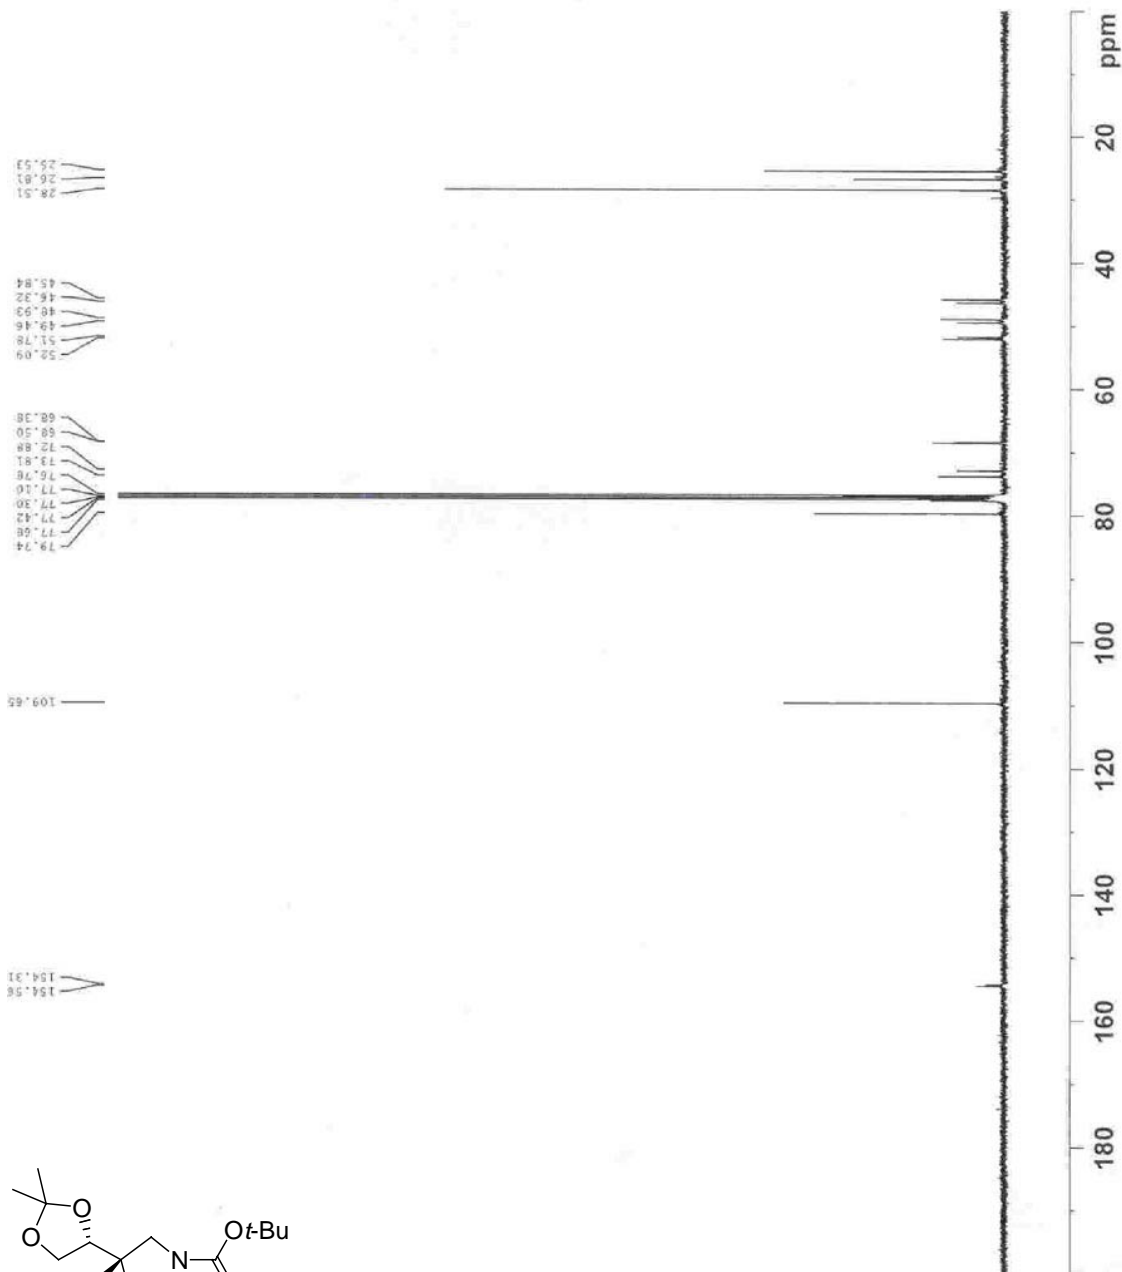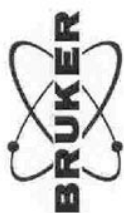

Current Data Parameters  
 NAME smc544-1-1  
 EXPNO 13  
 PROCNO 1  
 F2 - Acquisition Parameters  
 Date\_ 20040821  
 Time 1:47  
 INSTRUM spect  
 PROBRD 9 mm QNP 1H/13  
 PULPROG zgpg30  
 TD 65536  
 SOLVENT CDCl3  
 NS 2048  
 DS 4  
 SWH 23980.814 Hz  
 FIDRES 0.365910 Hz  
 AQ 1.3664756 sec  
 RG 327.5  
 IN 16384  
 DE 20.850 usec  
 TE 234.9 K  
 D1 2.0000000 sec  
 d11 0.0300000 sec  
 DELTA 1.8999999 sec  
 MZRES1 0.6000000 sec  
 MZRES2 0.6150000 sec  
 CHANNEL F1 nucleus 13C  
 NUC1 13C  
 P1 13C  
 PL1 0.0000000 sec  
 SFO1 100.6225298 MHz  
 CHANNEL F2 nucleus 1H  
 CPMRG2 saltz16  
 NUC2 1H  
 P2 1H  
 PL2 0.0000000 sec  
 SFO2 400.1316005 MHz  
 F2 - Processing parameters  
 SI 32768  
 SF 100.617633 MHz  
 NMR 128  
 SSB 0  
 LB 1.00 Hz  
 GB 0  
 EC 1.40

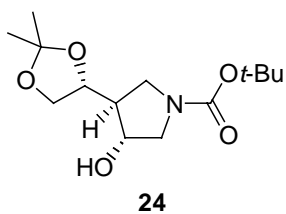

7.270  
7.006

4.442  
4.348  
4.333  
4.130  
4.083  
3.722  
3.697  
3.681  
3.649  
3.626  
3.602  
3.476  
3.302  
3.283  
3.275  
3.256  
3.200  
3.187  
3.012  
2.872  
2.772  
2.534  
2.292  
2.274  
2.239  
2.221  
2.002  
1.979  
1.968  
1.957  
1.821  
1.678  
1.661  
1.644  
1.627  
1.609  
1.553  
1.502  
1.452  
1.402  
1.367  
1.347  
1.293  
1.154  
1.196  
1.188  
0.894  
0.878

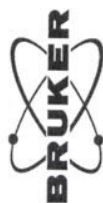

Current Data Parameters  
NAME smc577-2-2  
EXPNO 10  
PROCNO 1

F2 - Acquisition Parameters  
Date\_ 20041121  
Time 15.48  
INSTRUM spect  
PROBHD 5 mm QNP 1H/13  
PULPROG zgpg30  
TD 65536  
SOLVENT CDCl3  
NS 16  
DS 2  
SWH 8278.146 Hz  
FIDRES 0.161114 Hz  
AQ 3.958423 sec  
RG 128  
DW 60.400 usec  
DE 6.00 usec  
TE 298.0 K  
T2 1.0000000 sec  
MCREST 0.0000000 sec  
MCWFK 0.01500000 sec

===== CHANNEL f1 =====  
NUC1 1H  
P1 10.50 usec  
PL1 0.00 dB  
SFO1 400.1324710 MHz

F2 - Processing parameters  
SI 32768  
SF 400.1300052 MHz  
WDW EM  
SSB 0  
LB 0.30 Hz  
GB 0  
PC 1.00

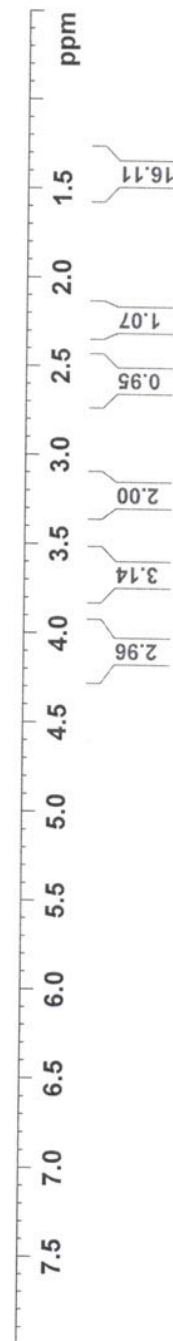

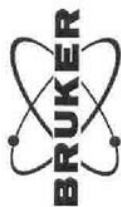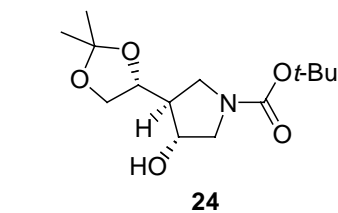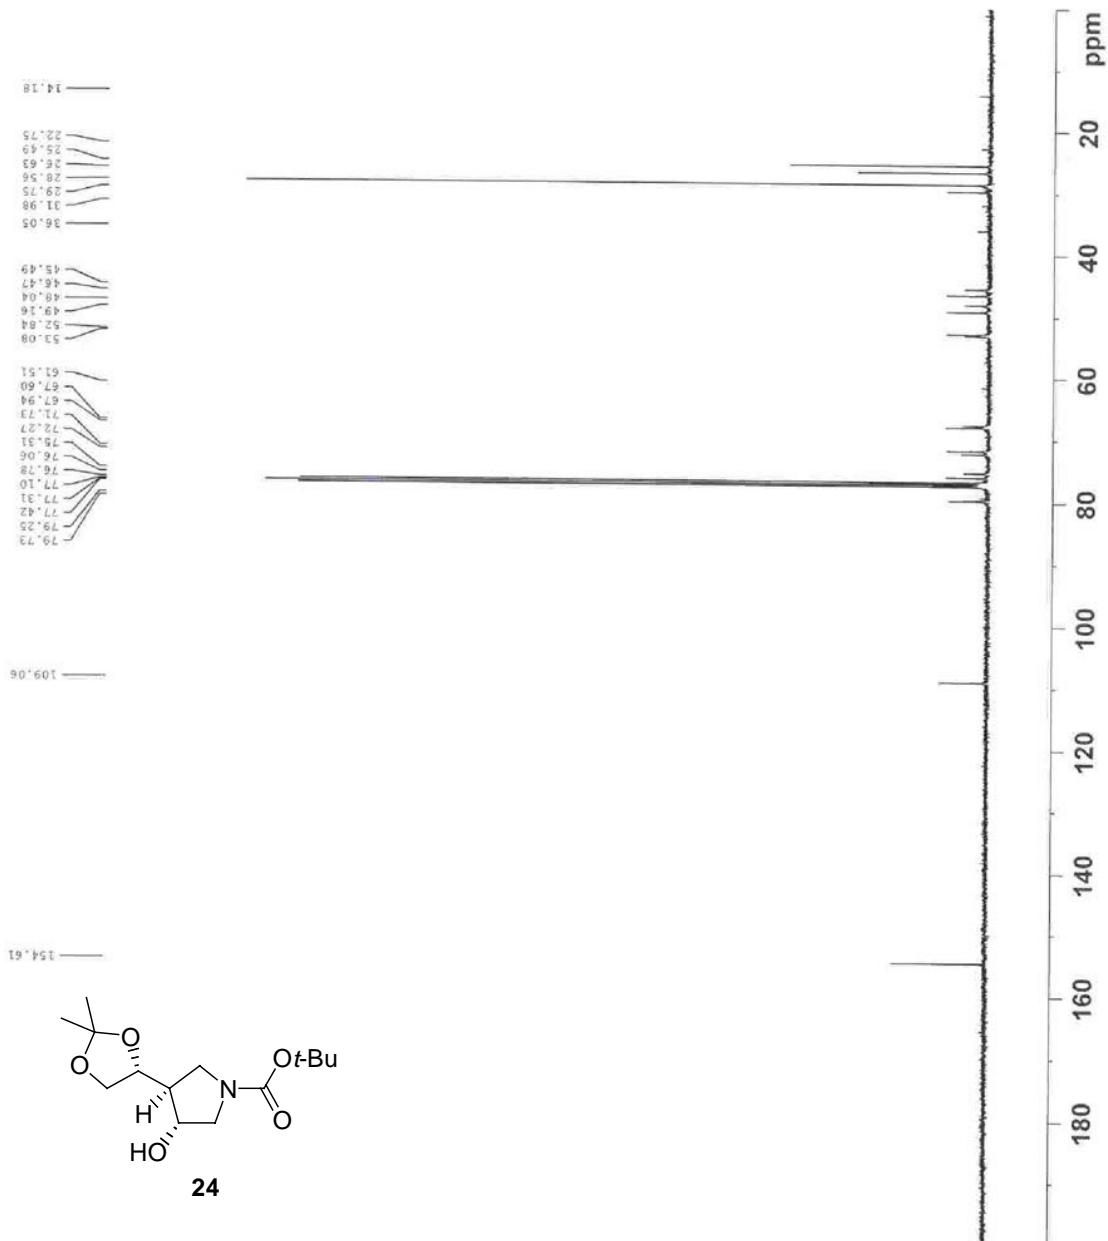

Current Data Parameters  
 NAME smc577-2-pure  
 EXPNO 11  
 PROCNO 1

F2 - Acquisition Parameters  
 Date\_ 20041122  
 Time 3.00  
 INSTRUM spect  
 PULPROG zgpg30  
 TD 65536  
 SOLVENT CDCl3  
 NS 2048  
 DS 4  
 SWH 23940.814 Hz  
 FIDRES 0.355918 Hz  
 AQ 1.3664756 sec  
 RG 181  
 DW 20.850 usec  
 DE 6.00 usec  
 TE 300.2 K  
 D1 2.0000000 sec  
 d11 0.0300000 sec  
 DELTA 1.8999998 sec  
 MCREST 0.0000000 sec  
 PCWRA 0.0150000 sec

===== CHANNEL f1 =====  
 NUC1 <sup>13</sup>C  
 P1 8.12 usec  
 PL1 0.00 dB  
 SFO1 100.622498 MHz

===== CHANNEL f2 =====  
 NUC2 <sup>1</sup>H  
 P2 12.00 usec  
 PL2 0.00 dB  
 SFO2 400.1316005 MHz

F2 - Processing parameters  
 SI 32768  
 SF 100.612743 MHz  
 MDW 0  
 SSB 0  
 LB 1.00 Hz  
 GB 0  
 PC 1.50



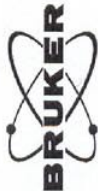

Current Data Parameters  
 NAME smc59pure  
 EXPNO 41  
 PROCNO 1

F2 - Acquisition Parameters  
 Date\_ 2004122  
 Time 12.00  
 INSTRUM spect  
 PROBRD 5 mm QNP 1H/13  
 PULPROG zgpg30  
 TD 65536  
 SOLVENT DMSO  
 NS 16  
 DS 2  
 SWH 8276.145 Hz  
 FIDRES 0.126114 Hz  
 AQ 3.3984256 sec  
 RG 327.5  
 DW 60.400 usec  
 DE 6.00 usec  
 TE 298.2 K  
 D1 1.00000000 sec  
 DELTA 0.00000000 sec  
 ACQRES 0.01500000 sec

===== CHANNEL f1 =====  
 NUC1 13C  
 P1 10.50 usec  
 PL1 0.00 dB  
 SF01 400.1324710 MHz

F2 - Processing Parameters  
 SI 32768  
 SF 400.1300000 MHz  
 WDW EM  
 SSB 0  
 LB 0.30 Hz  
 GB 0  
 PC 1.00

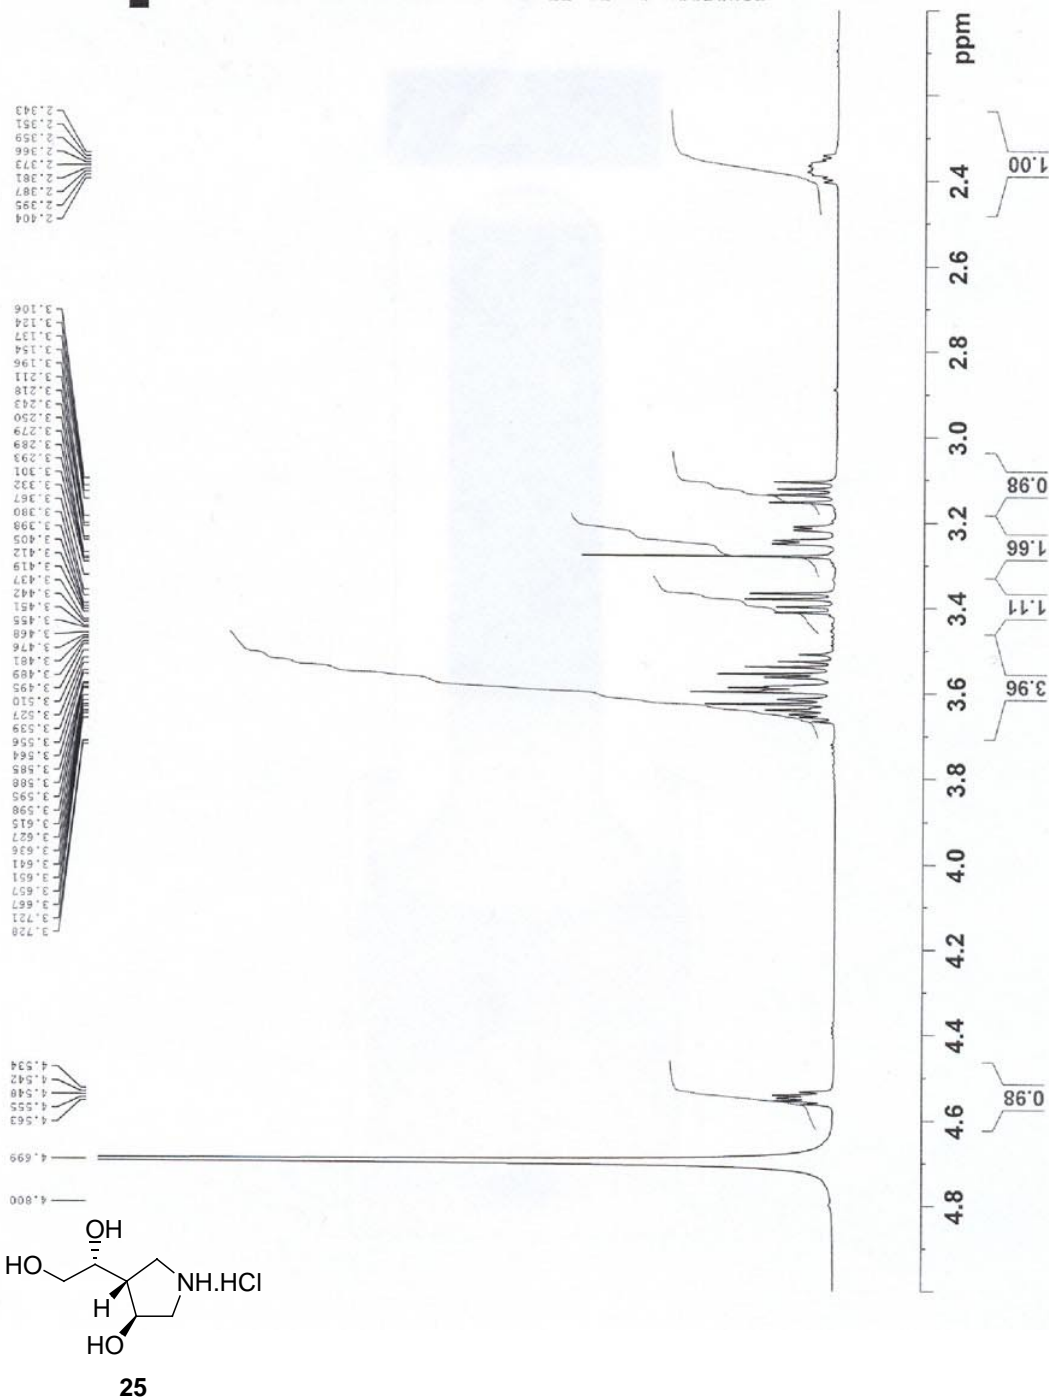

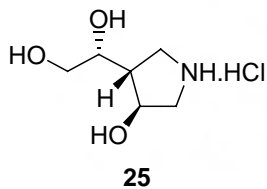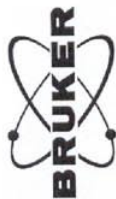

70.75  
70.32  
63.80  
52.27  
48.87  
47.80  
46.51

Current Data Parameters  
NAME sm558pure  
EXPNO 21  
PROCNO 1

F2 - Acquisition Parameters  
Date\_ 20041122  
Time 21.05  
INSTRUM spect  
PULPROG zgpg30  
TD 65536  
SOLVENT D2O  
NS 2048  
DS 4  
SWH 23980.814 Hz  
FIDRES 0.365918 Hz  
AQ 1.364716 sec  
RG 327.1  
GB 20.810 usec  
EB 6.00 usec  
TE 299.0 K  
D1 2.0000000 sec  
d11 0.3500000 sec  
DELTA 0.3500000 sec  
PCPD2 80.00 usec  
PL2 0.00 dB  
PL3 1.00 dB  
PL4 21.00 dB  
SFO2 400.1316065 MHz

F2 - Processing parameters  
SF 400.1316065 MHz  
WDW EM  
SSB 0  
LB 1.00 Hz  
GB 0  
PC 1.40

===== CHANNEL f1 =====  
NUC1 13C  
P1 8.12 usec  
PL1 0.00 dB  
SFO1 100.6228298 MHz

===== CHANNEL f2 =====  
CPOBPG2 waltz16  
NUC2 1H  
PCPD2 80.00 usec  
PL2 0.00 dB  
PL3 1.00 dB  
PL4 21.00 dB  
SFO2 400.1316065 MHz

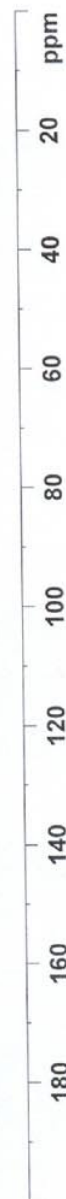

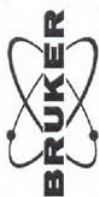

Current Data Parameters  
 NAME smc594  
 F2PROG 1.0  
 F2PCNO 1

F2 - Acquisition Parameters  
 Date\_ 20041124  
 Time\_ 12:25  
 INSTRUM spect  
 PROBD 5 mm QNP 1H/13  
 PULPROG zgpg30  
 TD 65536  
 SOLVENT DMS  
 NS 14  
 DS 2  
 SMH 8278.146 Hz  
 FIDRES 0.126314 Hz  
 AQ 3.954253 sec  
 RG 327.5  
 ZW 20.000 MHz  
 DE 60.400 usec  
 TE 298.0 K  
 D1 1.00000000 sec  
 d11 0.05000000 sec  
 DELTAT 0.01500000 sec  
 ACQRES 0.01500000 sec

CHANNEL f1  
 NUC1 1H  
 P1 10.50 usec  
 PL1 0.00 dB  
 SFO1 400.1324710 MHz

F2 - Processing parameters  
 SI 32768  
 SF 400.1324710 MHz  
 RG 327.5  
 SSF 0  
 SSB 0.30 Hz  
 LB 0  
 GB 0  
 PC 1.00

3.76  
3.64  
3.57  
3.46  
3.33  
3.25  
3.13

3.801  
3.784  
3.777  
3.773  
3.761  
3.615  
3.604  
3.585  
3.574  
3.566  
3.559  
3.550  
3.542  
3.530  
3.520  
3.509  
3.499  
3.492  
3.479  
3.462  
3.455  
3.424  
3.410  
3.351  
3.305  
3.287  
3.283  
3.256  
3.209  
3.200  
3.178  
3.169

4.411  
4.401  
4.397  
4.391  
4.387  
4.377

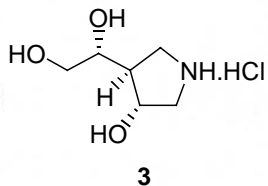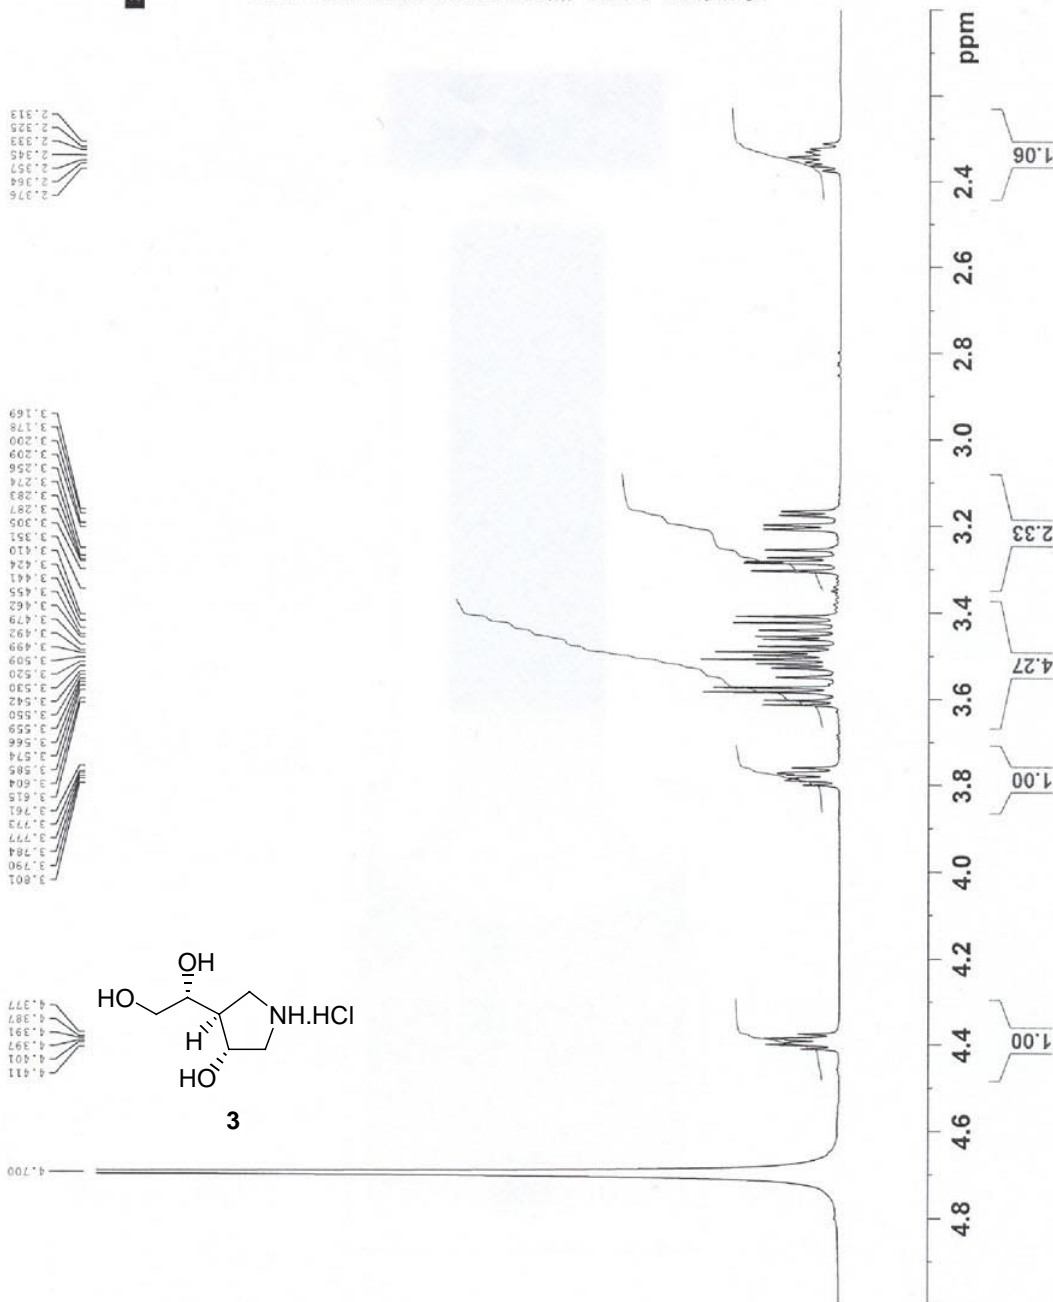

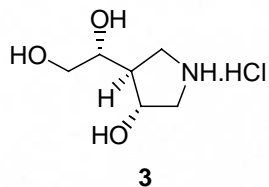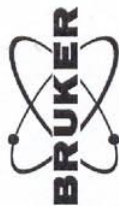

Current Data Parameters  
NAME zmc584  
EXPNO 11  
PROCNO 1

F2 - Acquisition Parameters  
Date\_ 20041124  
Time\_ 21.45  
INSTRUM spect  
PROBHD 5 mm QNP  
PULPROG zgpg30  
TD 65536  
SOLVENT D2O  
NS 2048  
DS 4  
SWH 23980.814 Hz  
FIDRES 0.365918 Hz  
AQ 1.3664756 sec  
RG 362  
LW 20.850 usec  
HE 24.000 usec  
TE 298.2 K  
D1 2.00000000 sec  
d11 0.03000000 sec  
DELTA 1.89999998 sec  
MCRET 0.00000000 sec  
XWRR 0.01500000 sec

===== CHANNEL f1 =====  
NUC1 13C  
P1 8.12 usec  
PL1 0.00 dB  
SFO1 100.628296 MHz

===== CHANNEL f2 =====  
CPDPRG2 waltz16  
NUC2 1H  
PCPD2 80.00 usec  
PL2 0.00 dB  
PL12 18.00 dB  
PL13 21.00 dB  
SFO2 400.1316005 MHz

F2 - Processing parameters  
SI 32768  
SF 100.6127690 MHz  
WDW EM  
SSB 0  
LB 1.00 Hz  
GB 0  
PC 1.40

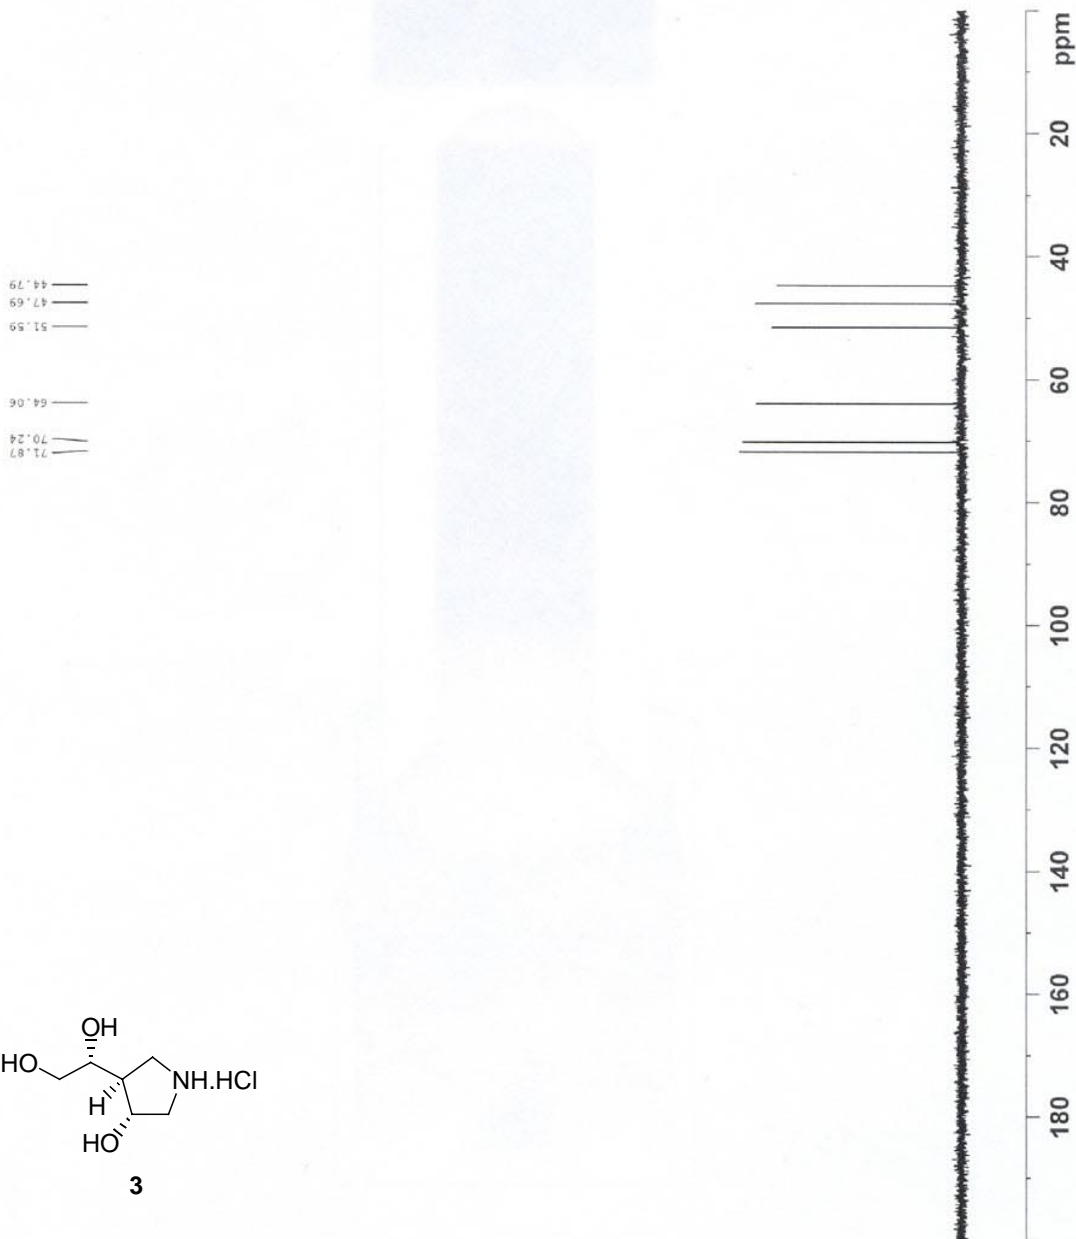

Supplement: Supplementary file 1 [file 5112295]
